# Supplementary material for: Protein denaturation caused by heat inactivation detrimentally affects biomolecular corona formation and cellular uptake
Source: Royal Society of Chemistry journal article supplement (doi:10.1039/c8nr07424k), 2018-01-01
Supplement: c8nr07424k2.xlsx [file c8nr07424k2.xlsx]

## Sheet: Table S5
Table S5. All identified corona proteins for PS-PEGNC and HES nanocapsules.
The average amount of each protein in % was calculated based on the total amount of all identified proteins (fmol).

## Sheet: PS
			Amount in % based on all identified proteins					Amount in fmol
Accession	Annotation	Description	Serum 56 °C	Serum	Plasma 56 °C	Plasma	Pre Clu Serum 56 °C	Serum 56 °C	Serum	Plasma 56 °C	Plasma	Pre Clu Serum 56 °C
P02763	Acute Phase	Alpha-1-acid glycoprotein 1 OS=Homo sapiens GN=ORM1 PE=1 SV=1	0.0509331	0.0209401	0.0330525	0.00775282	0.109038	1.22309	0.69645	1.63094	0.500061	0.800027
P19652	Acute Phase	Alpha-1-acid glycoprotein 2 OS=Homo sapiens GN=ORM2 PE=1 SV=2	0.149703	0.0431894	0.0965539	0.0734973	0.142642	3.59491	1.43644	4.76435	4.74061	1.04658
P01011	Acute Phase	Alpha-1-antichymotrypsin OS=Homo sapiens GN=SERPINA3 PE=1 SV=2	2.56655	0.0509084	0.890844	0.0105885	0.92413	61.6324	1.69317	43.9578	0.682967	6.78047
P01009	Acute Phase	Alpha-1-antitrypsin OS=Homo sapiens GN=SERPINA1 PE=1 SV=3	7.78698	0.121653	6.0361	0.114461	2.43209	186.994	4.04606	297.845	7.38283	17.8446
P01023	Acute Phase	Alpha-2-macroglobulin OS=Homo sapiens GN=A2M PE=1 SV=3	0.162234	0.727557	0.39569	0.244466	0.172193	3.89584	24.1979	19.5249	15.7682	1.2634
P00450	Acute Phase	Ceruloplasmin OS=Homo sapiens GN=CP PE=1 SV=1	0.0335161	0.0261634	0.538476	0	0	0.804845	0.870171	26.5706	0	0
P02751	Acute Phase	Fibronectin OS=Homo sapiens GN=FN1 PE=1 SV=4	0.223368	0.167311	0.415751	0	0.243972	5.36389	5.56461	20.5148	0	1.79005
P00738	Acute Phase	Haptoglobin OS=Homo sapiens GN=HP PE=1 SV=1	0.186596	0.0782236	0.775127	0.0621382	0.596626	4.48085	2.60165	38.2478	4.00795	4.37753
P00739	Acute Phase	Haptoglobin-related protein OS=Homo sapiens GN=HPR PE=2 SV=2	0.253976	0.0131303	0.11278	0.0792928	0.103017	6.09891	0.436703	5.56499	5.11443	0.755849
P18428	Acute Phase	Lipopolysaccharide-binding protein OS=Homo sapiens GN=LBP PE=1 SV=3	0.0367087	0.0127046	0.00902258	0	0	0.881512	0.422542	0.44521	0	0
P0DJI8;P0DJI9	Acute Phase	Serum amyloid A-1 protein OS=Homo sapiens GN=SAA1 PE=1 SV=1	0	0.0236445	0	0	0.0547751	0	0.786396	0	0	0.401892
P02743	Acute Phase	Serum amyloid P-component OS=Homo sapiens GN=APCS PE=1 SV=2	0.228492	0.0866307	0	0	0.158176	5.48694	2.88126	0	0	1.16056
P08697	Coagulation	Alpha-2-antiplasmin OS=Homo sapiens GN=SERPINF2 PE=1 SV=3	0.131232	0	0.129574	0	0.0723148	3.15136	0	6.39371	0	0.530583
P01008	Coagulation	Antithrombin-III OS=Homo sapiens GN=SERPINC1 PE=1 SV=1	2.90556	8.68835	0.864953	0	3.32815	69.7731	288.967	42.6802	0	24.4191
Q96IY4	Coagulation	Carboxypeptidase B2 OS=Homo sapiens GN=CPB2 PE=1 SV=2	0	0.0940084	0.0254591	0	0	0	3.12664	1.25625	0	0
P00740	Coagulation	Coagulation factor IX OS=Homo sapiens GN=F9 PE=1 SV=2	0	0	0.148926	0	0	0	0	7.3486	0	0
P12259	Coagulation	Coagulation factor V OS=Homo sapiens GN=F5 PE=1 SV=4	0	0.0844892	0	0	0	0	2.81003	0	0	0
P00742	Coagulation	Coagulation factor X OS=Homo sapiens GN=F10 PE=1 SV=2	0	0	0.0659026	0	0.0730094	0	0	3.2519	0	0.53568
P02671	Coagulation	Fibrinogen alpha chain OS=Homo sapiens GN=FGA PE=1 SV=2	0	0.00594616	1.72848	0.118115	0	0	0.197764	85.2903	7.61849	0
P02675	Coagulation	Fibrinogen beta chain OS=Homo sapiens GN=FGB PE=1 SV=2	0	0	2.342	0.0258416	0.0981259	0	0	115.563	1.6668	0.719963
P02679	Coagulation	Fibrinogen gamma chain OS=Homo sapiens GN=FGG PE=1 SV=3	0	0	3.55217	0.0594539	0	0	0	175.278	3.83481	0
P05546	Coagulation	Heparin cofactor 2 OS=Homo sapiens GN=SERPIND1 PE=1 SV=3	0.102088	0	0.289355	0	0	2.45152	0	14.2779	0	0
Q14520	Coagulation	Hyaluronan-binding protein 2 OS=Homo sapiens GN=HABP2 PE=1 SV=1	0.0551205	0	0	0	0	1.32365	0	0	0	0
P08514	Coagulation	Integrin alpha-IIb OS=Homo sapiens GN=ITGA2B PE=1 SV=3	0.0947764	0.0317088	0	0.0119243	0.127845	2.27593	1.05461	0	0.769126	0.938017
P05106	Coagulation	Integrin beta-3 OS=Homo sapiens GN=ITGB3 PE=1 SV=2	0.0202167	0.0643374	0	0	0.325091	0.485478	2.1398	0	0	2.38523
P29622	Coagulation	Kallistatin OS=Homo sapiens GN=SERPINA4 PE=1 SV=3	0.563816	0	0.0681754	0	0	13.5393	0	3.36404	0	0
P01042	Coagulation	Kininogen-1 OS=Homo sapiens GN=KNG1 PE=1 SV=2	0.349696	0.0392355	0.158682	10.5147	0.167834	8.39749	1.30494	7.82999	678.202	1.23142
P03952	Coagulation	Plasma kallikrein OS=Homo sapiens GN=KLKB1 PE=1 SV=1	0.201204	0	0.104876	0	0	4.83165	0	5.17501	0	0
P00747	Coagulation	Plasminogen OS=Homo sapiens GN=PLG PE=1 SV=2	0.223186	0	0.308651	0	0.0721111	5.35951	0	15.2301	0	0.529089
P00734	Coagulation	Prothrombin OS=Homo sapiens GN=F2 PE=1 SV=2	0.386161	0.454445	0.739992	0	0.669048	9.27315	15.1145	36.5142	0	4.90889
P07996	Coagulation	Thrombospondin-1 OS=Homo sapiens GN=THBS1 PE=1 SV=2	0.0739951	0	0	0	0	1.77689	0	0	0	0
P07225	Coagulation	Vitamin K-dependent protein S OS=Homo sapiens GN=PROS1 PE=1 SV=1	0	0	0.0637214	0	0	0	0	3.14427	0	0
P02730	Complement system	Band 3 anion transport protein OS=Homo sapiens GN=SLC4A1 PE=1 SV=3	0	0.0204576	0	0	0.0764494	0	0.680401	0	0	0.56092
P04003	Complement system	C4b-binding protein alpha chain OS=Homo sapiens GN=C4BPA PE=1 SV=2	0.0492235	0.0649421	0.15855	0	0	1.18204	2.15992	7.82347	0	0
P02745	Complement system	Complement C1q subcomponent subunit A OS=Homo sapiens GN=C1QA PE=1 SV=2	0	0	0.257288	0	0	0	0	12.6956	0	0
P02746	Complement system	Complement C1q subcomponent subunit B OS=Homo sapiens GN=C1QB PE=1 SV=3	0.155047	0	0.523383	0	0	3.72325	0	25.8258	0	0
P02747	Complement system	Complement C1q subcomponent subunit C OS=Homo sapiens GN=C1QC PE=1 SV=3	1.2108	0.0159817	0.46414	0	0.0589458	29.0756	0.531538	22.9025	0	0.432494
P00736	Complement system	Complement C1r subcomponent OS=Homo sapiens GN=C1R PE=1 SV=2	0.371671	0.031557	0.152078	0.0277239	0	8.92518	1.04956	7.50413	1.78821	0
Q9NZP8	Complement system	Complement C1r subcomponent-like protein OS=Homo sapiens GN=C1RL PE=1 SV=2	0	0	0.0329745	0	0	0	0	1.62709	0	0
P09871	Complement system	Complement C1s subcomponent OS=Homo sapiens GN=C1S PE=1 SV=1	0.209189	0.104968	0.41951	0.0517484	0	5.0234	3.49116	20.7003	3.3378	0
P06681	Complement system	Complement C2 OS=Homo sapiens GN=C2 PE=1 SV=2	0.0841592	0	0.0480674	0	0	2.02097	0	2.37184	0	0
P01024	Complement system	Complement C3 OS=Homo sapiens GN=C3 PE=1 SV=2	0.495528	1.00421	0.494455	0	0.289698	11.8994	33.3992	24.3984	0	2.12555
P0C0L4	Complement system	Complement C4-A OS=Homo sapiens GN=C4A PE=1 SV=2	0.166486	0.048738	0.14529	0.0734392	0.290208	3.99795	1.62098	7.16917	4.73686	2.12929
P0C0L5	Complement system	Complement C4-B OS=Homo sapiens GN=C4B PE=1 SV=2	0.107883	0.0266061	0.122074	0.0533996	0.186846	2.59067	0.884895	6.02359	3.4443	1.37091
P01031	Complement system	Complement C5 OS=Homo sapiens GN=C5 PE=1 SV=4	0.170583	0	0.219359	0	0	4.09633	0	10.8241	0	0
P13671	Complement system	Complement component C6 OS=Homo sapiens GN=C6 PE=1 SV=3	0.0849751	0.0422796	0.388464	0	0	2.04056	1.40618	19.1684	0	0
P10643	Complement system	Complement component C7 OS=Homo sapiens GN=C7 PE=1 SV=2	0	0.030253	0.475763	0	0	0	1.00619	23.476	0	0
P07357	Complement system	Complement component C8 alpha chain OS=Homo sapiens GN=C8A PE=1 SV=2	0	0.011808	0.0805629	0	0	0	0.392723	3.97529	0	0
P07358	Complement system	Complement component C8 beta chain OS=Homo sapiens GN=C8B PE=1 SV=3	0.045886	0	0.159276	0	0	1.10189	0	7.85933	0	0
P07360	Complement system	Complement component C8 gamma chain OS=Homo sapiens GN=C8G PE=1 SV=3	0.0397931	0.0183148	0.187309	0	0	0.955579	0.609134	9.24258	0	0
P02748	Complement system	Complement component C9 OS=Homo sapiens GN=C9 PE=1 SV=2	0.828543	0.167683	0.344565	0.124784	0.152741	19.8964	5.57698	17.0022	8.0486	1.12068
P00751	Complement system	Complement factor B OS=Homo sapiens GN=CFB PE=1 SV=2	0.51969	0	0.524898	0	0.189671	12.4797	0	25.9006	0	1.39164
P08603	Complement system	Complement factor H OS=Homo sapiens GN=CFH PE=1 SV=4	0.375624	0.0166595	0	0	0.305342	9.02011	0.55408	0	0	2.24033
P08603;Q03591	Complement system	Complement factor H OS=Homo sapiens GN=CFH PE=1 SV=4	0	0	0.170233	0	0	0	0	8.39995	0	0
Q02985	Complement system	Complement factor H-related protein 3 OS=Homo sapiens GN=CFHR3 PE=1 SV=2	0	0	0.0473269	0	0	0	0	2.3353	0	0
P05156	Complement system	Complement factor I OS=Homo sapiens GN=CFI PE=1 SV=2	0.0464441	0	0	0	0	1.11529	0	0	0	0
O75636	Complement system	Ficolin-3 OS=Homo sapiens GN=FCN3 PE=1 SV=2	0	0	0.220601	0	0	0	0	10.8854	0	0
P11226	Complement system	Mannose-binding protein C OS=Homo sapiens GN=MBL2 PE=1 SV=2	0	0	0.706752	0	0	0	0	34.874	0	0
P05155	Complement system	Plasma protease C1 inhibitor OS=Homo sapiens GN=SERPING1 PE=1 SV=2	0.390723	0.0869066	0.242912	0.0112404	0.137608	9.38268	2.89044	11.9862	0.72501	1.00965
P27918	Complement system	Properdin OS=Homo sapiens GN=CFP PE=1 SV=2	0	0.181251	0	0	0	0	6.02825	0	0	0
P08670	Complement system	Vimentin OS=Homo sapiens GN=VIM PE=1 SV=4	0.297549	0	0	0	0	7.14525	0	0	0	0
P01876	Immunoglobulins	Ig alpha-1 chain C region OS=Homo sapiens GN=IGHA1 PE=1 SV=2	0.841094	0.156229	0.643959	0.113894	0.918103	20.1978	5.19603	31.7755	7.34622	6.73624
P01877	Immunoglobulins	Ig alpha-2 chain C region OS=Homo sapiens GN=IGHA2 PE=1 SV=3	0.0966412	0.014984	0.0767078	0.0196638	0.0698819	2.32071	0.498354	3.78507	1.26832	0.512733
P01880	Immunoglobulins	Ig delta chain C region OS=Homo sapiens GN=IGHD PE=1 SV=2	0.084574	0	0.106481	0	0	2.03093	0	5.2542	0	0
P01857	Immunoglobulins	Ig gamma-1 chain C region OS=Homo sapiens GN=IGHG1 PE=1 SV=1	2.18611	0.334269	3.41792	0.261545	2.22304	52.4965	11.1175	168.654	16.8698	16.3108
P01859	Immunoglobulins	Ig gamma-2 chain C region OS=Homo sapiens GN=IGHG2 PE=1 SV=2	0.625385	0.0817199	0.824716	0.294749	1.06507	15.0178	2.71793	40.6948	19.0114	7.8146
P01860	Immunoglobulins	Ig gamma-3 chain C region OS=Homo sapiens GN=IGHG3 PE=1 SV=2	0.321185	0.0463183	0.570069	0.0314868	0.323956	7.71283	1.54051	28.1295	2.03091	2.37691
P01861	Immunoglobulins	Ig gamma-4 chain C region OS=Homo sapiens GN=IGHG4 PE=1 SV=1	0.103482	0	0.502514	0.0123874	0.392239	2.48499	0	24.7961	0.798993	2.87791
P01764;P01765	Immunoglobulins	Ig heavy chain V-III region 23 OS=Homo sapiens GN=IGHV3-23 PE=1 SV=2	0.103121	0	0	0	0	2.47631	0	0	0	0
P01764	Immunoglobulins	Ig heavy chain V-III region 23 OS=Homo sapiens GN=IGHV3-23 PE=1 SV=2	0	0	0.0895582	0	0	0	0	4.41916	0	0
P01766;P01767;P01771;P01774;P01777	Immunoglobulins	Ig heavy chain V-III region BRO OS=Homo sapiens PE=1 SV=1	0.358632	0	0	0	0	8.61207	0	0	0	0
P01766;P01777	Immunoglobulins	Ig heavy chain V-III region BRO OS=Homo sapiens PE=1 SV=1	0	0.0912298	0	0	0	0	3.03422	0	0	0
P01766	Immunoglobulins	Ig heavy chain V-III region BRO OS=Homo sapiens PE=1 SV=1	0	0	0.220634	0.031376	0	0	0	10.887	2.02377	0
P01781	Immunoglobulins	Ig heavy chain V-III region GAL OS=Homo sapiens PE=1 SV=1	0.0715611	0.046764	0.0736288	0	0	1.71845	1.55533	3.63314	0	0
P01765	Immunoglobulins	Ig heavy chain V-III region TIL OS=Homo sapiens PE=1 SV=1	0	0.029995	0	0.0125515	0	0	0.997607	0	0.809577	0
P01765;P01779	Immunoglobulins	Ig heavy chain V-III region TIL OS=Homo sapiens PE=1 SV=1	0	0	0.0857059	0	0	0	0	4.22907	0	0
P01779	Immunoglobulins	Ig heavy chain V-III region TUR OS=Homo sapiens PE=1 SV=1	0.126449	0	0	0	0	3.03651	0	0	0	0
P01763	Immunoglobulins	Ig heavy chain V-III region WEA OS=Homo sapiens PE=1 SV=1	0.0559791	0	0	0	0	1.34426	0	0	0	0
P01763;P01767	Immunoglobulins	Ig heavy chain V-III region WEA OS=Homo sapiens PE=1 SV=1	0	0	0.0416458	0	0	0	0	2.05497	0	0
P01834	Immunoglobulins	Ig kappa chain C region OS=Homo sapiens GN=IGKC PE=1 SV=1	3.39186	0.90164	3.90066	0.464617	3.18153	81.4509	29.9877	192.474	29.968	23.3433
P01593;P01607;P01608	Immunoglobulins	Ig kappa chain V-I region AG OS=Homo sapiens PE=1 SV=1	0	0	0.0394061	0	0	0	0	1.94445	0	0
P01609;P01600	Immunoglobulins	Ig kappa chain V-I region Scw OS=Homo sapiens PE=1 SV=1	0	0.0173389	0	0	0	0	0.576677	0	0	0
P01610	Immunoglobulins	Ig kappa chain V-I region WEA OS=Homo sapiens PE=1 SV=1	0	0	0.0222129	0	0	0	0	1.09607	0	0
P01614	Immunoglobulins	Ig kappa chain V-II region Cum OS=Homo sapiens PE=1 SV=1	0.48858	0	0.0253055	0	0	11.7326	0	1.24867	0	0
P06310	Immunoglobulins	Ig kappa chain V-II region RPMI 6410 OS=Homo sapiens PE=4 SV=1	0	0	0.173592	0	0	0	0	8.5657	0	0
P01617	Immunoglobulins	Ig kappa chain V-II region TEW OS=Homo sapiens PE=1 SV=1	0.0486965	0.0401677	0	0	0	1.16938	1.33594	0	0	0
P01621	Immunoglobulins	Ig kappa chain V-III region NG9 (Fragment) OS=Homo sapiens PE=2 SV=1	0.0945233	0.0429348	0.0697458	0	0	2.26985	1.42797	3.44154	0	0
P01620;P01622;P01623;P04206	Immunoglobulins	Ig kappa chain V-III region SIE OS=Homo sapiens PE=1 SV=1	0	0.085639	0.126445	0	0	0	2.84828	6.23928	0	0
P01623;P01620;P01622;P04206;P18135;P18136	Immunoglobulins	Ig kappa chain V-III region WOL OS=Homo sapiens PE=1 SV=1	0	0	0	0.0485137	0	0	0	0	3.12916	0
P01625;P06312;P06313;P06314	Immunoglobulins	Ig kappa chain V-IV region Len OS=Homo sapiens PE=1 SV=2	0.0865635	0	0.07158	0	0	2.07871	0	3.53204	0	0
P01625	Immunoglobulins	Ig kappa chain V-IV region Len OS=Homo sapiens PE=1 SV=2	0	0.0214629	0	0.00878043	0	0	0.713837	0	0.566342	0
P80748	Immunoglobulins	Ig lambda chain V-III region LOI OS=Homo sapiens PE=1 SV=1	0	0	0.122491	0	0	0	0	6.04421	0	0
P0CG05;A0M8Q6;P0CF74;P0CG06	Immunoglobulins	Ig lambda-2 chain C regions OS=Homo sapiens GN=IGLC2 PE=1 SV=1	1.73707	0	0	0	0	41.7134	0	0	0	0
P0CG05;P0CF74;P0CG06	Immunoglobulins	Ig lambda-2 chain C regions OS=Homo sapiens GN=IGLC2 PE=1 SV=1	0	0	0.491981	0	0	0	0	24.2763	0	0
P0CG06;P0CF74;P0CG05	Immunoglobulins	Ig lambda-3 chain C regions OS=Homo sapiens GN=IGLC3 PE=1 SV=1	0	0	0	0	1.00924	0	0	0	0	7.40492
P0CG06;A0M8Q6;P0CF74;P0CG05	Immunoglobulins	Ig lambda-3 chain C regions OS=Homo sapiens GN=IGLC3 PE=1 SV=1	0	0.0606928	0	0	0	0	2.01859	0	0	0
A0M8Q6	Immunoglobulins	Ig lambda-7 chain C region OS=Homo sapiens GN=IGLC7 PE=4 SV=2	0	0	0.0158948	0	0.232115	0	0	0.784315	0	1.70306
P01871;P04220	Immunoglobulins	Ig mu chain C region OS=Homo sapiens GN=IGHM PE=1 SV=3	0	0	1.35426	0	0.529493	0	0	66.8246	0	3.88496
P01871	Immunoglobulins	Ig mu chain C region OS=Homo sapiens GN=IGHM PE=1 SV=3	2.29644	0.668305	0	0.234185	0	55.1459	22.2272	0	15.1051	0
P04220	Immunoglobulins	Ig mu heavy chain disease protein OS=Homo sapiens PE=1 SV=1	0	0	0.0154128	0	0.90455	0	0	0.760531	0	6.63681
P01767;A0A0B4J1X5;A0A0C4DH42;P01764;P01772	Immunoglobulins	Immunoglobulin heavy variable 3-53 OS=Homo sapiens GN=IGHV3-53 PE=1 SV=2	0	0	0	0	0.121667	0	0	0	0	0.892689
P01825;A0A0C4DH41;P01824;P06331	Immunoglobulins	Immunoglobulin heavy variable 4-59 OS=Homo sapiens GN=IGHV4-59 PE=1 SV=2	0	0	0	0	0.0932078	0	0	0	0	0.683879
P01591	Immunoglobulins	Immunoglobulin J chain OS=Homo sapiens GN=JCHAIN PE=1 SV=4	0.100342	0.033629	0.0879504	0.00815602	0.0610357	2.40958	1.11847	4.33982	0.526067	0.447828
P01624;A0A0C4DH55	Immunoglobulins	Immunoglobulin kappa variable 3-15 OS=Homo sapiens GN=IGKV3-15 PE=1 SV=2	0	0	0	0	0.0849351	0	0	0	0	0.62318
P01619;A0A0C4DH25	Immunoglobulins	Immunoglobulin kappa variable 3-20 OS=Homo sapiens GN=IGKV3-20 PE=1 SV=2	0	0	0	0	0.220693	0	0	0	0	1.61925
B9A064;P0CG04	Immunoglobulins	Immunoglobulin lambda-like polypeptide 5 OS=Homo sapiens GN=IGLL5 PE=2 SV=2	0.938839	0	1.51935	0.127441	1.42801	22.545	0	74.9708	8.21999	10.4775
P43632	Immunoglobulins	Killer cell immunoglobulin-like receptor 2DS4 OS=Homo sapiens GN=KIR2DS4 PE=1 SV=2	0	0.297747	0	0	0	0	9.90282	0	0	0
P02647	Lipoproteins	Apolipoprotein A-I OS=Homo sapiens GN=APOA1 PE=1 SV=1	30.7746	9.81325	24.556	14.7368	28.4652	739.012	326.38	1211.69	950.53	208.853
P02652	Lipoproteins	Apolipoprotein A-II OS=Homo sapiens GN=APOA2 PE=1 SV=1	0.368617	0.202027	0.554827	0.126781	0.348998	8.85185	6.71925	27.3774	8.17744	2.56064
P06727	Lipoproteins	Apolipoprotein A-IV OS=Homo sapiens GN=APOA4 PE=1 SV=3	3.08439	3.91059	2.31523	2.55602	4.23189	74.0674	130.063	114.243	164.864	31.0499
Q6Q788	Lipoproteins	Apolipoprotein A-V OS=Homo sapiens GN=APOA5 PE=1 SV=1	0	0.0347744	0	0	0	0	1.15657	0	0	0
P04114	Lipoproteins	Apolipoprotein B-100 OS=Homo sapiens GN=APOB PE=1 SV=2	0.337571	0.15171	0.165198	0.11887	0	8.10631	5.04573	8.15152	7.66716	0
P02655	Lipoproteins	Apolipoprotein C-II OS=Homo sapiens GN=APOC2 PE=1 SV=1	0.0566263	0.12049	0.110525	0.0236655	0	1.3598	4.00739	5.45374	1.52643	0
P02656	Lipoproteins	Apolipoprotein C-III OS=Homo sapiens GN=APOC3 PE=1 SV=1	1.34011	2.25213	1.40565	0.844315	1.48475	32.1809	74.9039	69.3605	54.4587	10.8938
P05090	Lipoproteins	Apolipoprotein D OS=Homo sapiens GN=APOD PE=1 SV=1	0.141227	0.169347	0.084492	0.0971369	0.0758771	3.39137	5.63232	4.16917	6.26538	0.556721
P02649	Lipoproteins	Apolipoprotein E OS=Homo sapiens GN=APOE PE=1 SV=1	0.336651	0.950763	0.29816	0.923095	0.240908	8.08422	31.6215	14.7124	59.5401	1.76758
O14791	Lipoproteins	Apolipoprotein L1 OS=Homo sapiens GN=APOL1 PE=1 SV=5	0.032659	0.0237938	0.0537641	0	0.0369888	0.784262	0.791361	2.65293	0	0.271392
O95445	Lipoproteins	Apolipoprotein M OS=Homo sapiens GN=APOM PE=1 SV=2	0	0.0241406	0.108701	0.0500534	0.0446589	0	0.802894	5.36374	3.22847	0.327669
P02749	Lipoproteins	Beta-2-glycoprotein 1 OS=Homo sapiens GN=APOH PE=1 SV=3	0.805099	0.0249084	0.712948	0.0147373	0.655425	19.3334	0.828432	35.1797	0.950562	4.80894
P10909	Lipoproteins	Clusterin OS=Homo sapiens GN=CLU PE=1 SV=1	3.0077	55.0948	3.15333	52.2138	14.0283	72.2259	1832.4	155.598	3367.82	102.928
P06858	Lipoproteins	Lipoprotein lipase OS=Homo sapiens GN=LPL PE=1 SV=1	0	0.0136306	0	0	0	0	0.453343	0	0	0
P04180	Lipoproteins	Phosphatidylcholine-sterol acyltransferase OS=Homo sapiens GN=LCAT PE=1 SV=1	0.0211963	0	0.0210694	0	0	0.509	0	1.03965	0	0
P55058	Lipoproteins	Phospholipid transfer protein OS=Homo sapiens GN=PLTP PE=1 SV=1	0.046588	1.01894	0.0666443	0.0490751	0.114859	1.11875	33.8889	3.2885	3.16537	0.842736
P27169	Lipoproteins	Serum paraoxonase/arylesterase 1 OS=Homo sapiens GN=PON1 PE=1 SV=3	0.577074	0.0594945	0.441896	0.182153	0.32312	13.8577	1.97873	21.8049	11.7489	2.37078
O43242	Other Plasma components	26S proteasome non-ATPase regulatory subunit 3 OS=Homo sapiens GN=PSMD3 PE=1 SV=2	0	0	0	0.01816	0	0	0	0	1.17133	0
Q9BYD6	Other Plasma components	39S ribosomal protein L1, mitochondrial OS=Homo sapiens GN=MRPL1 PE=1 SV=2	0.0159394	0	0	0	0	0.382763	0	0	0	0
P28039	Other Plasma components	Acyloxyacyl hydrolase OS=Homo sapiens GN=AOAH PE=1 SV=1	0	0	0	0.0295289	0	0	0	0	1.90463	0
P84077;P61204;P84085	Other Plasma components	ADP-ribosylation factor 1 OS=Homo sapiens GN=ARF1 PE=1 SV=2	0	0.0162284	0	0	0	0	0.539741	0	0	0
P40616	Other Plasma components	ADP-ribosylation factor-like protein 1 OS=Homo sapiens GN=ARL1 PE=1 SV=1	0	0	0.136639	0	0	0	0	6.7423	0	0
P43652	Other Plasma components	Afamin OS=Homo sapiens GN=AFM PE=1 SV=1	0.168589	0.0147884	0.122073	0	0.127137	4.04845	0.491849	6.02355	0	0.932821
P05187	Other Plasma components	Alkaline phosphatase, placental type OS=Homo sapiens GN=ALPP PE=1 SV=2	0	0.0305201	0	0	0	0	1.01507	0	0	0
Q10469	Other Plasma components	Alpha-1,6-mannosyl-glycoprotein 2-beta-N-acetylglucosaminyltransferase OS=Homo sapiens GN=MGAT2 PE=1 SV=1	0	0	0.215314	0	0	0	0	10.6245	0	0
P04217	Other Plasma components	Alpha-1B-glycoprotein OS=Homo sapiens GN=A1BG PE=1 SV=4	1.06995	0	0.864525	0	1.64096	25.6935	0	42.6591	0	12.0399
P02765	Other Plasma components	Alpha-2-HS-glycoprotein OS=Homo sapiens GN=AHSG PE=1 SV=1	0.172751	0	1.74787	0	0.422697	4.14838	0	86.2467	0	3.10139
A8K2U0	Other Plasma components	Alpha-2-macroglobulin-like protein 1 OS=Homo sapiens GN=A2ML1 PE=1 SV=3	0	0	0	0.0157378	0	0	0	0	1.0151	0
Q9UJX3	Other Plasma components	Anaphase-promoting complex subunit 7 OS=Homo sapiens GN=ANAPC7 PE=1 SV=4	0	0.0126208	0	0	0	0	0.419757	0	0	0
Q9Y5C1	Other Plasma components	Angiopoietin-related protein 3 OS=Homo sapiens GN=ANGPTL3 PE=1 SV=1	0	0	0	0.029487	0	0	0	0	1.90193	0
P01019	Other Plasma components	Angiotensinogen OS=Homo sapiens GN=AGT PE=1 SV=1	0.413912	0.012427	0.101218	0	0.274482	9.93955	0.413311	4.9945	0	2.01391
O76027	Other Plasma components	Annexin A9 OS=Homo sapiens GN=ANXA9 PE=1 SV=3	0.0336099	0	0.0501941	0	0	0.807098	0	2.47678	0	0
P10415	Other Plasma components	Apoptosis regulator Bcl-2 OS=Homo sapiens GN=BCL2 PE=1 SV=2	0.0699195	0	0	0	0	1.67902	0	0	0	0
Q96KN2	Other Plasma components	Beta-Ala-His dipeptidase OS=Homo sapiens GN=CNDP1 PE=1 SV=4	0	0	0.0396859	0	0	0	0	1.95826	0	0
Q9H8M2	Other Plasma components	Bromodomain-containing protein 9 OS=Homo sapiens GN=BRD9 PE=1 SV=2	0	0	0	0.0509835	0	0	0	0	3.28846	0
Q5XKL5	Other Plasma components	BTB/POZ domain-containing protein 8 OS=Homo sapiens GN=BTBD8 PE=2 SV=2	0	0	0	0	0.0333326	0	0	0	0	0.244566
Q96EU7	Other Plasma components	C1GALT1-specific chaperone 1 OS=Homo sapiens GN=C1GALT1C1 PE=1 SV=1	0.0199834	0	0	0	0	0.479874	0	0	0	0
Q9P296	Other Plasma components	C5a anaphylatoxin chemotactic receptor 2 OS=Homo sapiens GN=C5AR2 PE=1 SV=1	0	0	0.14306	0	0	0	0	7.05913	0	0
Q8NE86	Other Plasma components	Calcium uniporter protein, mitochondrial OS=Homo sapiens GN=MCU PE=1 SV=1	0	0	0	0.0241189	0	0	0	0	1.55568	0
Q01064	Other Plasma components	Calcium/calmodulin-dependent 3',5'-cyclic nucleotide phosphodiesterase 1B OS=Homo sapiens GN=PDE1B PE=1 SV=2	0	0	0.0058789	0	0	0	0	0.290088	0	0
O75185	Other Plasma components	Calcium-transporting ATPase type 2C member 2 OS=Homo sapiens GN=ATP2C2 PE=1 SV=2	0	0	0	0	0.340429	0	0	0	0	2.49777
P27482	Other Plasma components	Calmodulin-like protein 3 OS=Homo sapiens GN=CALML3 PE=1 SV=2	0	0	0.0270293	0	0	0	0	1.33373	0	0
Q9UI42	Other Plasma components	Carboxypeptidase A4 OS=Homo sapiens GN=CPA4 PE=1 SV=2	0	0	0	0.0508895	0	0	0	0	3.2824	0
P22792	Other Plasma components	Carboxypeptidase N subunit 2 OS=Homo sapiens GN=CPN2 PE=1 SV=3	0.478332	0	0.121928	0	0.0540843	11.4865	0	6.01641	0	0.396824
P13688	Other Plasma components	Carcinoembryonic antigen-related cell adhesion molecule 1 OS=Homo sapiens GN=CEACAM1 PE=1 SV=2	0	0	0	0	0.274452	0	0	0	0	2.01369
Q8N752	Other Plasma components	Casein kinase I isoform alpha-like OS=Homo sapiens GN=CSNK1A1L PE=2 SV=2	0	0	0	0	0.0794179	0	0	0	0	0.5827
P31944	Other Plasma components	Caspase-14 OS=Homo sapiens GN=CASP14 PE=1 SV=2	0	0	0	0.00335413	0	0	0	0	0.216343	0
P07858	Other Plasma components	Cathepsin B OS=Homo sapiens GN=CTSB PE=1 SV=3	0	0	0	0.00500169	0	0	0	0	0.322612	0
P07339	Other Plasma components	Cathepsin D OS=Homo sapiens GN=CTSD PE=1 SV=1	0	0	0	0.053526	0	0	0	0	3.45246	0
P23435	Other Plasma components	Cerebellin-1 OS=Homo sapiens GN=CBLN1 PE=1 SV=1	0	0	0.0175514	0	0	0	0	0.866055	0	0
Q96NY7	Other Plasma components	Chloride intracellular channel protein 6 OS=Homo sapiens GN=CLIC6 PE=2 SV=3	0.00603337	0	0	0	0	0.144883	0	0	0	0
P11597	Other Plasma components	Cholesteryl ester transfer protein OS=Homo sapiens GN=CETP PE=1 SV=2	0	0.00450072	0.0117834	0	0	0	0.14969	0.581439	0	0
Q8NEF3	Other Plasma components	Coiled-coil domain-containing protein 112 OS=Homo sapiens GN=CCDC112 PE=1 SV=2	0	0.0682377	0	0	0	0	2.26952	0	0	0
P08185	Other Plasma components	Corticosteroid-binding globulin OS=Homo sapiens GN=SERPINA6 PE=1 SV=1	0.21667	0	0.108416	0	0.454308	5.20304	0	5.3497	0	3.33332
P01040	Other Plasma components	Cystatin-A OS=Homo sapiens GN=CSTA PE=1 SV=1	0	0	0	0.00884601	0	0	0	0	0.570572	0
Q14154	Other Plasma components	Death ligand signal enhancer OS=Homo sapiens GN=KIAA0141 PE=1 SV=3	0	0	0.250888	0	0	0	0	12.3798	0	0
Q9BPW9	Other Plasma components	Dehydrogenase/reductase SDR family member 9 OS=Homo sapiens GN=DHRS9 PE=1 SV=1	0.0958254	0	0	0	0	2.30112	0	0	0	0
Q9Y2S0	Other Plasma components	DNA-directed RNA polymerases I and III subunit RPAC2 OS=Homo sapiens GN=POLR1D PE=1 SV=1	0	0	0	0.0210698	0	0	0	0	1.35901	0
Q6RFH8;P0CJ85;P0CJ86;P0CJ87;P0CJ88;P0CJ89;P0CJ90;Q9UBX2	Other Plasma components	Double homeobox protein 4C OS=Homo sapiens GN=DUX4L9 PE=1 SV=1	0	0	0	0	0.359409	0	0	0	0	2.63703
Q96J02	Other Plasma components	E3 ubiquitin-protein ligase Itchy homolog OS=Homo sapiens GN=ITCH PE=1 SV=2	0	0.00200167	0	0	0	0	0.0665738	0	0	0
Q9UGM5	Other Plasma components	Fetuin-B OS=Homo sapiens GN=FETUB PE=1 SV=2	0.0447558	0	0.0606304	0	0	1.07475	0	2.99174	0	0
P09382	Other Plasma components	Galectin-1 OS=Homo sapiens GN=LGALS1 PE=1 SV=2	0	0	0	0	0.0267493	0	0	0	0	0.196263
P47929	Other Plasma components	Galectin-7 OS=Homo sapiens GN=LGALS7 PE=1 SV=2	0	0	0	0.163021	0	0	0	0	10.515	0
P17900	Other Plasma components	Ganglioside GM2 activator OS=Homo sapiens GN=GM2A PE=1 SV=4	0	0	0	0.00858977	0	0	0	0	0.554045	0
Q4G1C9	Other Plasma components	GLIPR1-like protein 2 OS=Homo sapiens GN=GLIPR1L2 PE=2 SV=2	0	0.00442831	0	0	0	0	0.147282	0	0	0
P69905	Other Plasma components	Hemoglobin subunit alpha OS=Homo sapiens GN=HBA1 PE=1 SV=2	0	0	0	0	0.156565	0	0	0	0	1.14874
P68871	Other Plasma components	Hemoglobin subunit beta OS=Homo sapiens GN=HBB PE=1 SV=2	0	0.103357	0	0	0.394697	0	3.43757	0	0	2.89595
P68871;P02042;P02100;P69891;P69892	Other Plasma components	Hemoglobin subunit beta OS=Homo sapiens GN=HBB PE=1 SV=2	0.227951	0	0	0	0	5.47393	0	0	0	0
P69892;P69891	Other Plasma components	Hemoglobin subunit gamma-2 OS=Homo sapiens GN=HBG2 PE=1 SV=2	0.0765321	0	0	0	0	1.83782	0	0	0	0
P02790	Other Plasma components	Hemopexin OS=Homo sapiens GN=HPX PE=1 SV=2	0.240702	0.0204587	3.33644	0.0244251	0.209311	5.78015	0.680437	164.633	1.57543	1.53574
O60243	Other Plasma components	Heparan-sulfate 6-O-sulfotransferase 1 OS=Homo sapiens GN=HS6ST1 PE=1 SV=5	0.00757272	0	0	0	0	0.181849	0	0	0	0
P51858	Other Plasma components	Hepatoma-derived growth factor OS=Homo sapiens GN=HDGF PE=1 SV=1	0	0.01645	0	0	0	0	0.547112	0	0	0
P82970	Other Plasma components	High mobility group nucleosome-binding domain-containing protein 5 OS=Homo sapiens GN=HMGN5 PE=1 SV=1	0	0	0	0.084489	0	0	0	0	5.44958	0
Q8N693	Other Plasma components	Homeobox protein ESX1 OS=Homo sapiens GN=ESX1 PE=1 SV=3	0	0	0	0.0508193	0	0	0	0	3.27787	0
Q86X24	Other Plasma components	HORMA domain-containing protein 1 OS=Homo sapiens GN=HORMAD1 PE=2 SV=1	1.5624	0	0	0	0	37.5189	0	0	0	0
A0A0B4J1X8;A0A0B4J1V1;P01763	Other Plasma components	Immunoglobulin heavy variable 3-43 OS=Homo sapiens GN=IGHV3-43 PE=3 SV=1	0	0	0	0	0.113184	0	0	0	0	0.830448
P58166	Other Plasma components	Inhibin beta E chain OS=Homo sapiens GN=INHBE PE=1 SV=1	0	0.0598439	0	0.164073	0	0	1.99036	0	10.5828	0
Q92551	Other Plasma components	Inositol hexakisphosphate kinase 1 OS=Homo sapiens GN=IP6K1 PE=1 SV=3	0.0377093	0	0	0	0	0.905539	0	0	0	0
P35858	Other Plasma components	Insulin-like growth factor-binding protein complex acid labile subunit OS=Homo sapiens GN=IGFALS PE=1 SV=1	0.00968862	0.0915389	0.0972073	0	0	0.232659	3.0445	4.79659	0	0
P19827	Other Plasma components	Inter-alpha-trypsin inhibitor heavy chain H1 OS=Homo sapiens GN=ITIH1 PE=1 SV=3	0.691873	0	1.24504	0	0.574126	16.6144	0	61.4351	0	4.21244
P19823	Other Plasma components	Inter-alpha-trypsin inhibitor heavy chain H2 OS=Homo sapiens GN=ITIH2 PE=1 SV=2	0.708159	0.051601	1.27145	0.0187131	0.185953	17.0055	1.7162	62.7387	1.20701	1.36436
Q06033	Other Plasma components	Inter-alpha-trypsin inhibitor heavy chain H3 OS=Homo sapiens GN=ITIH3 PE=1 SV=2	0.287472	0	0.150107	0	0	6.90327	0	7.40689	0	0
Q14624	Other Plasma components	Inter-alpha-trypsin inhibitor heavy chain H4 OS=Homo sapiens GN=ITIH4 PE=1 SV=4	0.684638	0	0.587673	0	0.216613	16.4407	0	28.9981	0	1.58932
Q15306	Other Plasma components	Interferon regulatory factor 4 OS=Homo sapiens GN=IRF4 PE=1 SV=1	0	0	0.128074	0	0	0	0	6.31966	0	0
P78552	Other Plasma components	Interleukin-13 receptor subunit alpha-1 OS=Homo sapiens GN=IL13RA1 PE=1 SV=1	0	0	0.0213497	0	0	0	0	1.05348	0	0
Q14116	Other Plasma components	Interleukin-18 OS=Homo sapiens GN=IL18 PE=1 SV=1	0.0540167	0	0	0	0	1.29714	0	0	0	0
Q5JU85	Other Plasma components	IQ motif and SEC7 domain-containing protein 2 OS=Homo sapiens GN=IQSEC2 PE=1 SV=1	1.31285	0	0	0	0	31.5264	0	0	0	0
Q96N16	Other Plasma components	Janus kinase and microtubule-interacting protein 1 OS=Homo sapiens GN=JAKMIP1 PE=1 SV=1	0	0	0	0.0317165	0	0	0	0	2.04573	0
Q9NRN7	Other Plasma components	L-aminoadipate-semialdehyde dehydrogenase-phosphopantetheinyl transferase OS=Homo sapiens GN=AASDHPPT PE=1 SV=2	1.50142	0	0	0	0	36.0546	0	0	0	0
P02750	Other Plasma components	Leucine-rich alpha-2-glycoprotein OS=Homo sapiens GN=LRG1 PE=1 SV=2	1.33795	0	0.451976	0	0.868878	32.129	0	22.3023	0	6.37507
Q15048	Other Plasma components	Leucine-rich repeat-containing protein 14 OS=Homo sapiens GN=LRRC14 PE=2 SV=1	0	0.207841	0	0	0	0	6.91262	0	0	0
Q9UHE5	Other Plasma components	N-acetyltransferase 8 OS=Homo sapiens GN=NAT8 PE=1 SV=2	0	0	0	0	0.0446909	0		0	0	0.327903
Q8NGZ5	Other Plasma components	Olfactory receptor 2G2 OS=Homo sapiens GN=OR2G2 PE=3 SV=1	0	0	0	0	0.168771	0	0	0	0	1.2383
O75665	Other Plasma components	Oral-facial-digital syndrome 1 protein OS=Homo sapiens GN=OFD1 PE=1 SV=1	0	0	0	0.0518774	0	0	0	0	3.34612	0
Q86UD1	Other Plasma components	Out at first protein homolog OS=Homo sapiens GN=OAF PE=2 SV=1	0	0.0173176	0	0	0	0	0.575969	0	0	0
Q14442	Other Plasma components	Phosphatidylinositol N-acetylglucosaminyltransferase subunit H OS=Homo sapiens GN=PIGH PE=1 SV=1	0	0.014766	0	0	0	0	0.491103	0	0	0
P36955	Other Plasma components	Pigment epithelium-derived factor OS=Homo sapiens GN=SERPINF1 PE=1 SV=4	0.178921	0	0.141442	0	0	4.29656	0	6.97932	0	0
P02776;P10720	Other Plasma components	Platelet factor 4 OS=Homo sapiens GN=PF4 PE=1 SV=2	0	0	0	0	0.245607	0	0	0	0	1.80205
P0CG48;P0CG47	Other Plasma components	Polyubiquitin-C OS=Homo sapiens GN=UBC PE=1 SV=3	0	0	0	0.00933259	0	0	0	0	0.601957	0
Q6S8J3;A5A3E0	Other Plasma components	POTE ankyrin domain family member E OS=Homo sapiens GN=POTEE PE=1 SV=3	0.01972	0	0	0.202109	0	0.47355	0	0	13.0361	0
P20742	Other Plasma components	Pregnancy zone protein OS=Homo sapiens GN=PZP PE=1 SV=4	0.0386717	0	0.115145	0	0	0.928648	0	5.68173	0	0
Q8N945	Other Plasma components	PRELI domain-containing protein 2 OS=Homo sapiens GN=PRELID2 PE=2 SV=1	0	0	0.086785	0	0	0	0	4.28232	0	0
Q7L014	Other Plasma components	Probable ATP-dependent RNA helicase DDX46 OS=Homo sapiens GN=DDX46 PE=1 SV=2	0	0.0385407	0	0.686175	0	0	1.28183	0	44.2586	0
P02760	Other Plasma components	Protein AMBP OS=Homo sapiens GN=AMBP PE=1 SV=1	0.513614	0.0123227	0.995903	0.0101992	0.169431	12.3338	0.409841	49.1418	0.657855	1.24314
O75629	Other Plasma components	Protein CREG1 OS=Homo sapiens GN=CREG1 PE=1 SV=1	0	0	0	0.026061	0	0	0	0	1.68095	0
P35659	Other Plasma components	Protein DEK OS=Homo sapiens GN=DEK PE=1 SV=1	0	0.147815	0	0	0	0	4.91621	0	0	0
Q6J272	Other Plasma components	Protein FAM166A OS=Homo sapiens GN=FAM166A PE=2 SV=1	0	0	0.0808881	0	0	0	0	3.99134	0	0
Q8WUF8	Other Plasma components	Protein FAM172A OS=Homo sapiens GN=FAM172A PE=2 SV=1	0	0.0368535	0	0	0	0	1.22572	0	0	0
Q6NSI3	Other Plasma components	Protein FAM53A OS=Homo sapiens GN=FAM53A PE=2 SV=1	0.102823	0	0	0	0	2.46916	0	0	0	0
Q9HAS0	Other Plasma components	Protein Njmu-R1 OS=Homo sapiens GN=C17orf75 PE=1 SV=2	0	0	0.0626142	0	0	0	0	3.08963	0	0
Q9HCY8	Other Plasma components	Protein S100-A14 OS=Homo sapiens GN=S100A14 PE=1 SV=1	0	0	0	0.00899972	0	0	0	0	0.580486	0
P31151;Q86SG5	Other Plasma components	Protein S100-A7 OS=Homo sapiens GN=S100A7 PE=1 SV=4	0	0	0	0.0280125	0	0	0	0	1.80682	0
P05109	Other Plasma components	Protein S100-A8 OS=Homo sapiens GN=S100A8 PE=1 SV=1	0	0	0	0.297306	0	0	0	0	19.1764	0
Q5T4F4	Other Plasma components	Protrudin OS=Homo sapiens GN=ZFYVE27 PE=1 SV=1	0	0	0	0	0.292113	0	0	0	0	2.14327
Q8NE18	Other Plasma components	Putative methyltransferase NSUN7 OS=Homo sapiens GN=NSUN7 PE=2 SV=4	0.177901	0	0	0	0	4.27205	0	0	0	0
A4D2B8	Other Plasma components	Putative postmeiotic segregation increased 2-like protein 1 OS=Homo sapiens GN=PMS2P1 PE=5 SV=1	0	0.0197684	0	0	0	0	0.657478	0	0	0
A6NEL3	Other Plasma components	Putative protein FAM86C2P OS=Homo sapiens GN=FAM86C2P PE=5 SV=1	0	0.0145752	0	0	0	0	0.484757	0	0	0
A8K554	Other Plasma components	Putative protein ZNF815 OS=Homo sapiens GN=ZNF815P PE=5 SV=1	0	0.0144459	0	0	0	0	0.480459	0	0	0
P62834;A6NIZ1;P61224	Other Plasma components	Ras-related protein Rap-1A OS=Homo sapiens GN=RAP1A PE=1 SV=1	0.0213511	0	0	0.0111941	0	0.512718	0	0	0.722025	0
P61224;A6NIZ1;P62834	Other Plasma components	Ras-related protein Rap-1b OS=Homo sapiens GN=RAP1B PE=1 SV=1	0	0.0300504	0	0	0	0	0.999449	0	0	0
P62070	Other Plasma components	Ras-related protein R-Ras2 OS=Homo sapiens GN=RRAS2 PE=1 SV=1	0	0	0	0.00672192	0	0	0	0	0.433567	0
Q9BQ04	Other Plasma components	RNA-binding protein 4B OS=Homo sapiens GN=RBM4B PE=1 SV=1	0	0	0.0175962	0	0	0	0	0.868265	0	0
P78332	Other Plasma components	RNA-binding protein 6 OS=Homo sapiens GN=RBM6 PE=1 SV=5	0	0.0279638	0	0	0	0	0.930052	0	0	0
Q14BN4	Other Plasma components	Sarcolemmal membrane-associated protein OS=Homo sapiens GN=SLMAP PE=1 SV=1	0.362922	0	0	0	0	8.7151	0	0	0	0
P02787	Other Plasma components	Serotransferrin OS=Homo sapiens GN=TF PE=1 SV=3	0.677753	0.0602465	0.496735	0.547455	0.459392	16.2753	2.00375	24.5109	35.3112	3.37062
P29508;P48594	Other Plasma components	Serpin B3 OS=Homo sapiens GN=SERPINB3 PE=1 SV=2	0	0	0	0.0453532	0	0	0	0	2.9253	0
P02768	Other Plasma components	Serum albumin OS=Homo sapiens GN=ALB PE=1 SV=2	4.57523	3.60087	7.2243	3.45294	10.2375	109.868	119.762	356.476	222.716	75.1136
P0DJI9;P0DJI8	Other Plasma components	Serum amyloid A-2 protein OS=Homo sapiens GN=SAA2 PE=1 SV=1	0.287752	0	0.0178004	0	0	6.90999	0	0.878342	0	0
P04278	Other Plasma components	Sex hormone-binding globulin OS=Homo sapiens GN=SHBG PE=1 SV=2	0.0412082	0	0.0622216	0	0.00639836	0.98956	0	3.07026	0	0.0469457
P35326;P22531;P22532;P35325;Q9BYE4	Other Plasma components	Small proline-rich protein 2A OS=Homo sapiens GN=SPRR2A PE=1 SV=1	0	0	0	0.0114977	0	0	0	0	0.741609	0
Q8IWT1	Other Plasma components	Sodium channel subunit beta-4 OS=Homo sapiens GN=SCN4B PE=1 SV=1	0	0	0	0.211932	0	0	0	0	13.6697	0
O14508	Other Plasma components	Suppressor of cytokine signaling 2 OS=Homo sapiens GN=SOCS2 PE=1 SV=1	0	0	0.00173049	0	0	0	0	0.0853892	0	0
P49368	Other Plasma components	T-complex protein 1 subunit gamma OS=Homo sapiens GN=CCT3 PE=1 SV=4	0.222721	0	0	0	0	5.34836	0	0	0	0
P22105;Q16473	Other Plasma components	Tenascin-X OS=Homo sapiens GN=TNXB PE=1 SV=4	0	0	0.0157283	0	0	0	0	0.776097	0	0
Q92563	Other Plasma components	Testican-2 OS=Homo sapiens GN=SPOCK2 PE=1 SV=1	0	0.0574972	0	0	0	0	1.91231	0	0	0
Q8NBS9	Other Plasma components	Thioredoxin domain-containing protein 5 OS=Homo sapiens GN=TXNDC5 PE=1 SV=2	0	0.0341084	0	0	0	0	1.13442	0	0	0
P05543	Other Plasma components	Thyroxine-binding globulin OS=Homo sapiens GN=SERPINA7 PE=1 SV=2	0.0597789	0	0.0216114	0	0	1.43551	0	1.06639	0	0
P57727	Other Plasma components	Transmembrane protease serine 3 OS=Homo sapiens GN=TMPRSS3 PE=1 SV=2	0	0.0170718	0	0	0	0	0.567794	0	0	0
P02766	Other Plasma components	Transthyretin OS=Homo sapiens GN=TTR PE=1 SV=1	0.128255	0.206761	0.18826	0.176773	0.311047	3.07987	6.87668	9.28949	11.402	2.28219
P07477;Q8NHM4	Other Plasma components	Trypsin-1 OS=Homo sapiens GN=PRSS1 PE=1 SV=1	0.011749	0	0	0	0	0.282137	0	0	0	0
Q8IWU9	Other Plasma components	Tryptophan 5-hydroxylase 2 OS=Homo sapiens GN=TPH2 PE=1 SV=1	0	0	0.0115931	0	0	0	0	0.572048	0	0
Q71U36;P68363;P68366;Q13748;Q6PEY2;Q9BQE3;Q9NY65	Other Plasma components	Tubulin alpha-1A chain OS=Homo sapiens GN=TUBA1A PE=1 SV=1	0	0.00632678	0	0	0	0	0.210423	0	0	0
Q8WVJ9	Other Plasma components	Twist-related protein 2 OS=Homo sapiens GN=TWIST2 PE=1 SV=1	0	0	0.305973	0	0	0	0	15.0979	0	0
P43405	Other Plasma components	Tyrosine-protein kinase SYK OS=Homo sapiens GN=SYK PE=1 SV=1	0.0389461	0	0	0	0	0.93524	0	0	0	0
Q9HBJ7	Other Plasma components	Ubiquitin carboxyl-terminal hydrolase 29 OS=Homo sapiens GN=USP29 PE=2 SV=1	0.0160707	0	0	0	0	0.385918	0	0	0	0
P02774	Other Plasma components	Vitamin D-binding protein OS=Homo sapiens GN=GC PE=1 SV=1	0.0352572	0.0117711	0.07641	0.00588527	0.224017	0.846655	0.391496	3.77038	0.379603	1.64365
Q9BQY6	Other Plasma components	WAP four-disulfide core domain protein 6 OS=Homo sapiens GN=WFDC6 PE=2 SV=1	0	0	0.0275776	0	0	0	0	1.36079	0	0
Q9UHR6	Other Plasma components	Zinc finger HIT domain-containing protein 2 OS=Homo sapiens GN=ZNHIT2 PE=1 SV=1	0	0.302169	0	0	0	0	10.0499	0	0	0
Q8N859	Other Plasma components	Zinc finger protein 713 OS=Homo sapiens GN=ZNF713 PE=2 SV=1	0	0.0292232	0	0	0	0	0.971937	0	0	0
P51815	Other Plasma components	Zinc finger protein 75D OS=Homo sapiens GN=ZNF75D PE=2 SV=2	0	0.12253	0	0	0	0	4.07524	0	0	0
P25311	Other Plasma components	Zinc-alpha-2-glycoprotein OS=Homo sapiens GN=AZGP1 PE=1 SV=2	0	0	0.049401	0.0386927	0.129145	0	0	2.43764	2.4957	0.947556
P62736;P63267;P68032;P68133	Tissue Leakage	Actin, aortic smooth muscle OS=Homo sapiens GN=ACTA2 PE=1 SV=1	0	0.0149539	0	0	0.154792	0	0.497352	0	0	1.13573
P60709;P63261;Q562R1	Tissue Leakage	Actin, cytoplasmic 1 OS=Homo sapiens GN=ACTB PE=1 SV=1	0	0.0621268	0	0	0	0	2.06628	0	0	0
P63261;P60709	Tissue Leakage	Actin, cytoplasmic 2 OS=Homo sapiens GN=ACTG1 PE=1 SV=1	0.0707006	0	0	0.0127458	0.00450153	1.69778	0	0	0.822108	0.0330283
Q8IW19	Tissue Leakage	Aprataxin and PNK-like factor OS=Homo sapiens GN=APLF PE=1 SV=1	0	0.0467687	0	0	0	0	1.55549	0	0	0
P53367	Tissue Leakage	Arfaptin-1 OS=Homo sapiens GN=ARFIP1 PE=1 SV=2	0	0.0081429	0	0	0	0	0.270826	0	0	0
P49913	Tissue Leakage	Cathelicidin antimicrobial peptide OS=Homo sapiens GN=CAMP PE=1 SV=1	0	0	0.194615	0.015235	0	0	0	9.60306	0.982664	0
O43866	Tissue Leakage	CD5 antigen-like OS=Homo sapiens GN=CD5L PE=1 SV=1	0.10453	0.0419349	0.0778926	0.0101542	0.057011	2.51014	1.39472	3.84353	0.654948	0.418298
Q14204	Tissue Leakage	Cytoplasmic dynein 1 heavy chain 1 OS=Homo sapiens GN=DYNC1H1 PE=1 SV=5	0.0535275	0	0	0	0	1.28539	0	0	0	0
Q8IYA6	Tissue Leakage	Cytoskeleton-associated protein 2-like OS=Homo sapiens GN=CKAP2L PE=1 SV=4	0	0.0280605	0	0	0	0	0.933268	0	0	0
P27105	Tissue Leakage	Erythrocyte band 7 integral membrane protein OS=Homo sapiens GN=STOM PE=1 SV=3	0.0216817	0.0322276	0	0	0.092203	0.520658	1.07186	0	0	0.676506
Q14240	Tissue Leakage	Eukaryotic initiation factor 4A-II OS=Homo sapiens GN=EIF4A2 PE=1 SV=2	0	0	0	0.270177	0	0	0	0	17.4266	0
P06396	Tissue Leakage	Gelsolin OS=Homo sapiens GN=GSN PE=1 SV=1	0.241542	0.0379875	0.157863	0	0.0495764	5.80032	1.26343	7.78958	0	0.363749
P04406	Tissue Leakage	Glyceraldehyde-3-phosphate dehydrogenase OS=Homo sapiens GN=GAPDH PE=1 SV=3	0	0.0349562	0	0.0223149	0	0	1.16261	0	1.43932	0
O14896	Tissue Leakage	Interferon regulatory factor 6 OS=Homo sapiens GN=IRF6 PE=1 SV=1	0	0	0	0.139831	0	0	0	0	9.01914	0
Q15323	Tissue Leakage	Keratin, type I cuticular Ha1 OS=Homo sapiens GN=KRT31 PE=1 SV=3	0.0167959	0.0113063	0	0	0	0.403332	0.376039	0	0	0
Q15323;Q14525	Tissue Leakage	Keratin, type I cuticular Ha1 OS=Homo sapiens GN=KRT31 PE=1 SV=3	0	0	0	1.10064	0	0	0	0	70.9915	0
O76013	Tissue Leakage	Keratin, type I cuticular Ha6 OS=Homo sapiens GN=KRT36 PE=2 SV=1	0	0	0	0.00434149	0	0	0	0	0.280029	0
O76015	Tissue Leakage	Keratin, type I cuticular Ha8 OS=Homo sapiens GN=KRT38 PE=1 SV=3	0	0	0	0.00794848	0	0	0	0	0.512681	0
P13645	Tissue Leakage	Keratin, type I cytoskeletal 10 OS=Homo sapiens GN=KRT10 PE=1 SV=6	0.0865813	0.0421337	0.231242	0.284895	0.395387	2.07914	1.40133	11.4104	18.3759	2.90101
P13646	Tissue Leakage	Keratin, type I cytoskeletal 13 OS=Homo sapiens GN=KRT13 PE=1 SV=4	0	0	0	0.0190217	0	0	0	0	1.22691	0
P02533;O76014;O76015;P08727;P13646;P19012;Q14525;Q7Z3Y7	Tissue Leakage	Keratin, type I cytoskeletal 14 OS=Homo sapiens GN=KRT14 PE=1 SV=4	0	0	0	0	0.0148162	0	0	0	0	0.108709
P02533;P08779	Tissue Leakage	Keratin, type I cytoskeletal 14 OS=Homo sapiens GN=KRT14 PE=1 SV=4	0.100067	0	0	0	0	2.40298	0	0	0	0
P02533	Tissue Leakage	Keratin, type I cytoskeletal 14 OS=Homo sapiens GN=KRT14 PE=1 SV=4	0	0	0	0.0260515	0	0	0	0	1.68034	0
P08779	Tissue Leakage	Keratin, type I cytoskeletal 16 OS=Homo sapiens GN=KRT16 PE=1 SV=4	0.0136522	0	0	0.195695	0	0.327839	0	0	12.6224	0
Q04695	Tissue Leakage	Keratin, type I cytoskeletal 17 OS=Homo sapiens GN=KRT17 PE=1 SV=2	0.00192446	0	0	0	0	0.0462134	0	0	0	0
Q04695;P08727;P19012;P35900	Tissue Leakage	Keratin, type I cytoskeletal 17 OS=Homo sapiens GN=KRT17 PE=1 SV=2	0	0	0	0.0739079	0	0	0	0	4.76709	0
P05783	Tissue Leakage	Keratin, type I cytoskeletal 18 OS=Homo sapiens GN=KRT18 PE=1 SV=2	0	0	0	0	0.389818	0	0	0	0	2.86015
Q2M2I5	Tissue Leakage	Keratin, type I cytoskeletal 24 OS=Homo sapiens GN=KRT24 PE=1 SV=1	0.0702568	0	0	0.0143387	0	1.68712	0	0	0.924854	0
Q7Z3Y7	Tissue Leakage	Keratin, type I cytoskeletal 28 OS=Homo sapiens GN=KRT28 PE=1 SV=2	0	0	0	0	0.00974738	0	0	0	0	0.0715178
P35527	Tissue Leakage	Keratin, type I cytoskeletal 9 OS=Homo sapiens GN=KRT9 PE=1 SV=3	0.019735	0.0338873	0.0516955	0.157888	0.133783	0.473909	1.12706	2.55086	10.1838	0.981587
Q9NSB2	Tissue Leakage	Keratin, type II cuticular Hb4 OS=Homo sapiens GN=KRT84 PE=2 SV=2	0	0	0	0.0390941	0	0	0	0	2.52159	0
P04264	Tissue Leakage	Keratin, type II cytoskeletal 1 OS=Homo sapiens GN=KRT1 PE=1 SV=6	0.130485	0	0.1072	0.745619	0.342943	3.13343	0	5.28969	48.0928	2.51622
P04264;Q7Z794	Tissue Leakage	Keratin, type II cytoskeletal 1 OS=Homo sapiens GN=KRT1 PE=1 SV=6	0	0.0670449	0	0	0	0	2.22985	0	0	0
Q7Z794	Tissue Leakage	Keratin, type II cytoskeletal 1b OS=Homo sapiens GN=KRT77 PE=2 SV=3	0	0	0	0.0301128	0.0595856	0	0	0	1.94229	0.437188
P35908	Tissue Leakage	Keratin, type II cytoskeletal 2 epidermal OS=Homo sapiens GN=KRT2 PE=1 SV=2	0.0440521	0.0140375	0.0406088	0.0835021	0.190539	1.05785	0.466875	2.0038	5.38593	1.39801
Q01546	Tissue Leakage	Keratin, type II cytoskeletal 2 oral OS=Homo sapiens GN=KRT76 PE=1 SV=2	0	0	0	0.120316	0.0994	0	0	0	7.76045	0.729311
P12035	Tissue Leakage	Keratin, type II cytoskeletal 3 OS=Homo sapiens GN=KRT3 PE=1 SV=3	0	0	0	0.0117048	0.0233525	0	0	0	0.754966	0.17134
P19013	Tissue Leakage	Keratin, type II cytoskeletal 4 OS=Homo sapiens GN=KRT4 PE=1 SV=4	0	0	0	0.0846284	0	0	0	0	5.45857	0
P13647	Tissue Leakage	Keratin, type II cytoskeletal 5 OS=Homo sapiens GN=KRT5 PE=1 SV=3	0.0110428	0	0	0.3857	0.0108912	0.265178	0	0	24.8779	0.0799099
P02538;P48668	Tissue Leakage	Keratin, type II cytoskeletal 6A OS=Homo sapiens GN=KRT6A PE=1 SV=3	0.00628831	0	0	0	0	0.151005	0	0	0	0
P04259	Tissue Leakage	Keratin, type II cytoskeletal 6B OS=Homo sapiens GN=KRT6B PE=1 SV=5	0	0	0.00858161	0	0.00605659	0	0	0.423451	0	0.044438
Q86Y46	Tissue Leakage	Keratin, type II cytoskeletal 73 OS=Homo sapiens GN=KRT73 PE=1 SV=1	0	0	0	0.11403	0	0	0	0	7.35501	0
O95678	Tissue Leakage	Keratin, type II cytoskeletal 75 OS=Homo sapiens GN=KRT75 PE=1 SV=2	0.00165225	0	0	0	0	0.0396766	0	0	0	0
Q8N1N4	Tissue Leakage	Keratin, type II cytoskeletal 78 OS=Homo sapiens GN=KRT78 PE=2 SV=2	0	0	0	0.00511433	0	0	0	0	0.329877	0
Q5XKE5	Tissue Leakage	Keratin, type II cytoskeletal 79 OS=Homo sapiens GN=KRT79 PE=1 SV=2	0	0	0	0.0162844	0	0	0	0	1.05035	0
P05787	Tissue Leakage	Keratin, type II cytoskeletal 8 OS=Homo sapiens GN=KRT8 PE=1 SV=7	0	0	0	0.0809295	0	0	0	0	5.21999	0
Q5T749	Tissue Leakage	Keratinocyte proline-rich protein OS=Homo sapiens GN=KPRP PE=1 SV=1	0	0	0	0.0195019	0	0	0	0	1.25788	0
P51884	Tissue Leakage	Lumican OS=Homo sapiens GN=LUM PE=1 SV=2	0.223972	0.0297282	0.278398	0.00960145	0	5.37838	0.988735	13.7373	0.619298	0
Q96PD5	Tissue Leakage	N-acetylmuramoyl-L-alanine amidase OS=Homo sapiens GN=PGLYRP2 PE=1 SV=1	0.030266	0	0.0251777	0	0	0.726797	0	1.24237	0	0
P12036	Tissue Leakage	Neurofilament heavy polypeptide OS=Homo sapiens GN=NEFH PE=1 SV=4	0	0	0	0.00803355	0	0	0	0	0.518168	0
P80108	Tissue Leakage	Phosphatidylinositol-glycan-specific phospholipase D OS=Homo sapiens GN=GPLD1 PE=1 SV=3	0	0	0.685347	0	0	0	0	33.8178	0	0
Q9Y2S7	Tissue Leakage	Polymerase delta-interacting protein 2 OS=Homo sapiens GN=POLDIP2 PE=1 SV=1	0	0.0945353	0	0	0	0	3.14416	0	0	0
A5A3E0	Tissue Leakage	POTE ankyrin domain family member F OS=Homo sapiens GN=POTEF PE=1 SV=2	0	0.178007	0	0	0	0	5.92036	0	0	0
Q9NQW5	Tissue Leakage	Probable histone-lysine N-methyltransferase PRDM7 OS=Homo sapiens GN=PRDM7 PE=1 SV=2	0	0.0336275	0	0	0	0	1.11842	0	0	0
P07737	Tissue Leakage	Profilin-1 OS=Homo sapiens GN=PFN1 PE=1 SV=2	0.0409626	0.00740788	0	0	0	0.983662	0.246379	0	0	0
P12273	Tissue Leakage	Prolactin-inducible protein OS=Homo sapiens GN=PIP PE=1 SV=1	0	0	0	0.0057547	0	0	0	0	0.371181	0
P06702	Tissue Leakage	Protein S100-A9 OS=Homo sapiens GN=S100A9 PE=1 SV=1	0	0	0	0.503749	0	0	0	0	32.4921	0
Q9H2S5	Tissue Leakage	RING finger protein 39 OS=Homo sapiens GN=RNF39 PE=2 SV=2	0.0156203	0	0	0	0	0.3751	0	0	0	0
P05452	Tissue Leakage	Tetranectin OS=Homo sapiens GN=CLEC3B PE=1 SV=3	0	0	0.072854	0	0	0	0	3.59491	0	0
Q96A61	Tissue Leakage	Tripartite motif-containing protein 52 OS=Homo sapiens GN=TRIM52 PE=1 SV=1	0	0.003934	0	0	0	0	0.130841	0	0	0
P04004	Tissue Leakage	Vitronectin OS=Homo sapiens GN=VTN PE=1 SV=1	1.96958	1.73091	1.28742	0.519736	0.680306	47.2969	57.5684	63.5266	33.5233	4.9915
Q6ZN30	Tissue Leakage	Zinc finger protein basonuclin-2 OS=Homo sapiens GN=BNC2 PE=1 SV=1	0.144088	2.36341	0.248964	2.90596	3.72295	3.46008	78.6049	12.2849	187.436	27.3158

## Sheet: HES
			Amount in % based on all identified proteins				Amount in fmol
Accession	Annotation	Description	Serum 56 °C	Serum	Plasma 56 °C	Plasma	Serum 56 °C	Serum	Plasma 56 °C	Plasma
P02763	Acute Phase	Alpha-1-acid glycoprotein 1 OS=Homo sapiens GN=ORM1 PE=1 SV=1	0.125171	0.0143459	0.1076	0.122759	0.316692	0.0630014	0.267793	0.429768
P19652	Acute Phase	Alpha-1-acid glycoprotein 2 OS=Homo sapiens GN=ORM2 PE=1 SV=2	0.017423	0.00125941	0.0178574	0.0160819	0.0440814	0.0055308	0.0444431	0.0563009
P01011	Acute Phase	Alpha-1-antichymotrypsin OS=Homo sapiens GN=SERPINA3 PE=1 SV=2	0.463078	0.523672	0.429339	0.432076	1.17162	2.29976	1.06853	1.51265
P01009	Acute Phase	Alpha-1-antitrypsin OS=Homo sapiens GN=SERPINA1 PE=1 SV=3	1.76008	0.355486	1.33418	0.346947	4.45312	1.56115	3.32048	1.21462
P01023	Acute Phase	Alpha-2-macroglobulin OS=Homo sapiens GN=A2M PE=1 SV=3	0.158991	0.0558649	0.217986	0.119456	0.402258	0.245336	0.542517	0.418203
P00450	Acute Phase	Ceruloplasmin OS=Homo sapiens GN=CP PE=1 SV=1	0.0622111	0.0558618	0.4092	0.193874	0.157399	0.245323	1.01841	0.678731
P02751	Acute Phase	Fibronectin OS=Homo sapiens GN=FN1 PE=1 SV=4	0.250551	1.05099	0.42044	0.230792	0.633912	4.61552	1.04638	0.807978
P00738	Acute Phase	Haptoglobin OS=Homo sapiens GN=HP PE=1 SV=1	0.681294	0.162016	0.553374	0.267274	1.72372	0.711508	1.37722	0.935697
P00739	Acute Phase	Haptoglobin-related protein OS=Homo sapiens GN=HPR PE=2 SV=2	0.602919	0.871736	0.417496	0.304604	1.52543	3.82831	1.03905	1.06639
P18428	Acute Phase	Lipopolysaccharide-binding protein OS=Homo sapiens GN=LBP PE=1 SV=3	0.0751056	0.118614	0.106434	0.0618572	0.190022	0.520905	0.264891	0.216555
P02743	Acute Phase	Serum amyloid P-component OS=Homo sapiens GN=APCS PE=1 SV=2	0.0704563	0.0110027	0.0309594	0.0344166	0.17826	0.0483193	0.0770509	0.120489
P08697	Coagulation	Alpha-2-antiplasmin OS=Homo sapiens GN=SERPINF2 PE=1 SV=3	0.207959	0.102427	0.178641	0.0757848	0.526151	0.44982	0.444597	0.265314
P01008	Coagulation	Antithrombin-III OS=Homo sapiens GN=SERPINC1 PE=1 SV=1	0.69537	5.93689	0.327119	7.23938	1.75934	26.0724	0.814126	25.3443
Q96IY4	Coagulation	Carboxypeptidase B2 OS=Homo sapiens GN=CPB2 PE=1 SV=2	0.00194318	0.0284327	0.0100321	0.0103443	0.00491638	0.124865	0.0249678	0.0362141
P00748	Coagulation	Coagulation factor XII OS=Homo sapiens GN=F12 PE=1 SV=3	0.0392042	0.00217889	0.0303485	0.0241813	0.0991895	0.00956882	0.0755305	0.084656
P02671	Coagulation	Fibrinogen alpha chain OS=Homo sapiens GN=FGA PE=1 SV=2	0.213048	0.177969	1.24865	0.671478	0.539025	0.781567	3.10762	2.35077
P02675	Coagulation	Fibrinogen beta chain OS=Homo sapiens GN=FGB PE=1 SV=2	0.14967	0.144669	1.47387	0.842538	0.378675	0.635328	3.66813	2.94964
P02679	Coagulation	Fibrinogen gamma chain OS=Homo sapiens GN=FGG PE=1 SV=3	0.0999008	0.0296015	2.57243	1.24255	0.252756	0.129998	6.4022	4.35005
P04196	Coagulation	Histidine-rich glycoprotein OS=Homo sapiens GN=HRG PE=1 SV=1	0.906092	0.360217	0.841821	0.480063	2.29248	1.58193	2.0951	1.68065
Q14520	Coagulation	Hyaluronan-binding protein 2 OS=Homo sapiens GN=HABP2 PE=1 SV=1	0.0892332	0	0.0520586	0.00893205	0.225766	0	0.129562	0.0312701
P08514	Coagulation	Integrin alpha-IIb OS=Homo sapiens GN=ITGA2B PE=1 SV=3	0.157668	0.0214012	0.125066	0.0649398	0.398911	0.0939854	0.31126	0.227347
P01042	Coagulation	Kininogen-1 OS=Homo sapiens GN=KNG1 PE=1 SV=2	0.170471	0.0465809	0.161105	0.0929354	0.431304	0.204564	0.400955	0.325357
P03952	Coagulation	Plasma kallikrein OS=Homo sapiens GN=KLKB1 PE=1 SV=1	0.0910958	0.00521614	0.0863322	0.0248999	0.230479	0.0229072	0.214861	0.0871717
P00734	Coagulation	Prothrombin OS=Homo sapiens GN=F2 PE=1 SV=2	0.61027	2.12399	0.653983	0.127575	1.54403	9.3277	1.62762	0.446625
P02730	Complement system	Band 3 anion transport protein OS=Homo sapiens GN=SLC4A1 PE=1 SV=3	0.0299954	0	0.00325694	0.0242577	0.0758905	0	0.0081058	0.0849238
P04003	Complement system	C4b-binding protein alpha chain OS=Homo sapiens GN=C4BPA PE=1 SV=2	0.274787	0.237447	0.200291	0.151519	0.695229	1.04277	0.49848	0.530454
P02746	Complement system	Complement C1q subcomponent subunit B OS=Homo sapiens GN=C1QB PE=1 SV=3	0.189975	0.0459518	0.225232	0.120296	0.480651	0.201802	0.560552	0.421144
P02747	Complement system	Complement C1q subcomponent subunit C OS=Homo sapiens GN=C1QC PE=1 SV=3	0.172231	0.070071	0.209491	0.11305	0.435757	0.307724	0.521376	0.395775
P00736	Complement system	Complement C1r subcomponent OS=Homo sapiens GN=C1R PE=1 SV=2	0.633578	0.201281	0.448376	0.426697	1.603	0.883945	1.11591	1.49382
P09871	Complement system	Complement C1s subcomponent OS=Homo sapiens GN=C1S PE=1 SV=1	0.0947077	0.122642	0.100879	0.0797976	0.239617	0.538593	0.251066	0.279363
P06681	Complement system	Complement C2 OS=Homo sapiens GN=C2 PE=1 SV=2	0.184921	0.211791	0.159569	0.0926876	0.467862	0.930102	0.397133	0.324489
P01024	Complement system	Complement C3 OS=Homo sapiens GN=C3 PE=1 SV=2	0.816192	6.75437	1.17424	1.94898	2.06502	29.6625	2.92242	6.82317
P0C0L4	Complement system	Complement C4-A OS=Homo sapiens GN=C4A PE=1 SV=2	0.26423	0.502854	0.174294	0.482808	0.668521	2.20833	0.433779	1.69026
P0C0L5	Complement system	Complement C4-B OS=Homo sapiens GN=C4B PE=1 SV=2	0.203558	0.38739	0.134273	0.371947	0.515016	1.70126	0.334175	1.30215
P01031	Complement system	Complement C5 OS=Homo sapiens GN=C5 PE=1 SV=4	0.32237	0.820174	0.372311	0.442173	0.81562	3.60187	0.926597	1.548
P13671	Complement system	Complement component C6 OS=Homo sapiens GN=C6 PE=1 SV=3	0.167546	0.292022	0.16651	0.132467	0.423903	1.28244	0.414406	0.463752
P10643	Complement system	Complement component C7 OS=Homo sapiens GN=C7 PE=1 SV=2	1.44441	1.84173	0.864175	0.723215	3.65445	8.08812	2.15074	2.5319
P07357	Complement system	Complement component C8 alpha chain OS=Homo sapiens GN=C8A PE=1 SV=2	0.0404017	0.177889	0.0382209	0.036091	0.102219	0.781218	0.0951232	0.126351
P07358	Complement system	Complement component C8 beta chain OS=Homo sapiens GN=C8B PE=1 SV=3	0.0415868	0.120736	0.125233	0.0816768	0.105217	0.530224	0.311677	0.285942
P07360	Complement system	Complement component C8 gamma chain OS=Homo sapiens GN=C8G PE=1 SV=3	0.105109	0.333376	0.115078	0.128503	0.265933	1.46405	0.286403	0.449876
P02748	Complement system	Complement component C9 OS=Homo sapiens GN=C9 PE=1 SV=2	0.206843	1.34923	0.230177	0.325791	0.523326	5.92529	0.572858	1.14056
P00751	Complement system	Complement factor B OS=Homo sapiens GN=CFB PE=1 SV=2	1.07057	0.390044	0.892238	0.200672	2.70863	1.71292	2.22058	0.702531
P08603;Q02985;Q03591	Complement system	Complement factor H OS=Homo sapiens GN=CFH PE=1 SV=4	1.27701	0.0743671	0.679684	0.100568	3.23092	0.32659	1.69158	0.352078
P05155	Complement system	Plasma protease C1 inhibitor OS=Homo sapiens GN=SERPING1 PE=1 SV=2	0.283741	0.0753873	0.311227	0.12344	0.717886	0.331071	0.774575	0.43215
P27918	Complement system	Properdin OS=Homo sapiens GN=CFP PE=1 SV=2	0.187933	1.11036	0.523252	0.455539	0.475484	4.87627	1.30226	1.59479
P01876	Immunoglobulins	Ig alpha-1 chain C region OS=Homo sapiens GN=IGHA1 PE=1 SV=2	1.64306	0.314165	1.50365	0.79538	4.15706	1.37969	3.74224	2.78454
P01877	Immunoglobulins	Ig alpha-2 chain C region OS=Homo sapiens GN=IGHA2 PE=1 SV=3	0.107907	0.0772835	0.090021	0.0548614	0.273013	0.339398	0.224042	0.192064
P01857	Immunoglobulins	Ig gamma-1 chain C region OS=Homo sapiens GN=IGHG1 PE=1 SV=1	3.19564	0.907621	3.06385	1.61297	8.08519	3.9859	7.62523	5.64683
P01859	Immunoglobulins	Ig gamma-2 chain C region OS=Homo sapiens GN=IGHG2 PE=1 SV=2	3.42767	5.21999	2.11851	1.53762	8.67225	22.9241	5.27249	5.38306
P01860	Immunoglobulins	Ig gamma-3 chain C region OS=Homo sapiens GN=IGHG3 PE=1 SV=2	0.249932	0.0365911	0.279854	0.121541	0.632347	0.160693	0.696493	0.425502
P01861	Immunoglobulins	Ig gamma-4 chain C region OS=Homo sapiens GN=IGHG4 PE=1 SV=1	0.0649997	0.00443583	0.10763	0.0482924	0.164454	0.0194804	0.267866	0.169066
P01834	Immunoglobulins	Ig kappa chain C region OS=Homo sapiens GN=IGKC PE=1 SV=1	4.89805	1.06932	3.65069	1.92669	12.3924	4.69603	9.08576	6.74513
P0CG05;A0M8Q6;P0CF74;P0CG06	Immunoglobulins	Ig lambda-2 chain C regions OS=Homo sapiens GN=IGLC2 PE=1 SV=1	0.94571	0.126388	0.861102	0.411614	2.39271	0.555047	2.14309	1.44102
P01871	Immunoglobulins	Ig mu chain C region OS=Homo sapiens GN=IGHM PE=1 SV=3	3.01355	0.49454	2.53603	1.16402	7.62449	2.17182	6.31161	4.0751
P04220	Immunoglobulins	Ig mu heavy chain disease protein OS=Homo sapiens PE=1 SV=1	0.146121	0.0216483	0.120578	0.0539426	0.369697	0.0950704	0.300091	0.188847
A0A0B4J1V1;A0A0B4J1X8;P01762;P01763	Immunoglobulins	Immunoglobulin heavy variable 3-21 OS=Homo sapiens GN=IGHV3-21 PE=1 SV=1	0.301532	0.0360762	0.271053	0.0858546	0.762898	0.158432	0.674589	0.300568
P01764;P01768	Immunoglobulins	Immunoglobulin heavy variable 3-23 OS=Homo sapiens GN=IGHV3-23 PE=1 SV=2	0.296591	0.0181858	0.157213	0.0491031	0.750395	0.0798646	0.391268	0.171905
A0A0A0MS15	Immunoglobulins	Immunoglobulin heavy variable 3-49 OS=Homo sapiens GN=IGHV3-49 PE=1 SV=1	0.0154304	0.000988832	0.0147635	0.00583687	0.0390401	0.00434255	0.0367431	0.0204342
P01767;A0A0B4J1X5;P01772	Immunoglobulins	Immunoglobulin heavy variable 3-53 OS=Homo sapiens GN=IGHV3-53 PE=1 SV=2	0.0270004	0.00298025	0.0146008	0.0101826	0.0683129	0.0130881	0.0363382	0.0356482
A0A075B6Q5	Immunoglobulins	Immunoglobulin heavy variable 3-64 OS=Homo sapiens GN=IGHV3-64 PE=3 SV=1	0.0345837	0.00246646	0.0331621	0.0158247	0.0874993	0.0108317	0.0825331	0.0554006
A0A0C4DH42	Immunoglobulins	Immunoglobulin heavy variable 3-66 OS=Homo sapiens GN=IGHV3-66 PE=3 SV=1	0.272105	0.17658	0.202981	0.125376	0.688444	0.775468	0.505174	0.43893
P01780	Immunoglobulins	Immunoglobulin heavy variable 3-7 OS=Homo sapiens GN=IGHV3-7 PE=1 SV=2	0.105675	0.0275598	0.0745583	0.0565065	0.267366	0.121032	0.185559	0.197823
A0A0B4J1Y9	Immunoglobulins	Immunoglobulin heavy variable 3-72 OS=Homo sapiens GN=IGHV3-72 PE=3 SV=1	0.046605	0.00168112	0.039645	0.0227037	0.117914	0.00738279	0.0986676	0.0794833
A0A0C4DH41;A0A075B6R2;P01824;P01825;P06331	Immunoglobulins	Immunoglobulin heavy variable 4-61 OS=Homo sapiens GN=IGHV4-61 PE=3 SV=1	0.306946	0.119277	0.205703	0.191362	0.776595	0.523815	0.511947	0.669937
P01591	Immunoglobulins	Immunoglobulin J chain OS=Homo sapiens GN=JCHAIN PE=1 SV=4	0.20159	0.0404933	0.182318	0.0947032	0.510037	0.17783	0.453748	0.331546
A0A0C4DH72	Immunoglobulins	Immunoglobulin kappa variable 1-6 OS=Homo sapiens GN=IGKV1-6 PE=3 SV=1	0.0997633	0.0375886	0.0806634	0.0466901	0.252408	0.165074	0.200753	0.163457
A0A075B6S6;P06310	Immunoglobulins	Immunoglobulin kappa variable 2D-30 OS=Homo sapiens GN=IGKV2D-30 PE=3 SV=1	0.0171061	0	0.00261032	9.91318e-05	0.0432797	0	0.0064965	0.00034705
P01619;A0A0C4DH25	Immunoglobulins	Immunoglobulin kappa variable 3-20 OS=Homo sapiens GN=IGKV3-20 PE=1 SV=2	0.260971	0.054563	0.0971725	0.0677863	0.660275	0.239619	0.241841	0.237312
P01700	Immunoglobulins	Immunoglobulin lambda variable 1-47 OS=Homo sapiens GN=IGLV1-47 PE=1 SV=2	0.0639014	0.00934048	0.0923596	0.0466441	0.161675	0.0410196	0.229862	0.163296
B9A064;P0CG04	Immunoglobulins	Immunoglobulin lambda-like polypeptide 5 OS=Homo sapiens GN=IGLL5 PE=2 SV=2	1.44574	0.193215	1.3164	0.629249	3.65783	0.84852	3.27622	2.20293
P02647	Lipoproteins	Apolipoprotein A-I OS=Homo sapiens GN=APOA1 PE=1 SV=1	5.79535	1.79114	5.1087	2.05273	14.6627	7.86597	12.7144	7.18638
P06727	Lipoproteins	Apolipoprotein A-IV OS=Homo sapiens GN=APOA4 PE=1 SV=3	5.39391	0.690824	1.7937	1.41656	13.647	3.03382	4.46413	4.95922
Q6Q788	Lipoproteins	Apolipoprotein A-V OS=Homo sapiens GN=APOA5 PE=1 SV=1	0.046294	0.0161594	0.0636857	0.0448494	0.117127	0.0709655	0.158499	0.157013
P04114	Lipoproteins	Apolipoprotein B-100 OS=Homo sapiens GN=APOB PE=1 SV=2	0.961919	1.76895	0.682081	0.74423	2.43372	7.7685	1.69755	2.60547
P05090	Lipoproteins	Apolipoprotein D OS=Homo sapiens GN=APOD PE=1 SV=1	0.193893	0.0770021	0.173803	0.159458	0.490564	0.338162	0.432558	0.558245
P02649	Lipoproteins	Apolipoprotein E OS=Homo sapiens GN=APOE PE=1 SV=1	0.709359	3.19772	0.376944	8.36057	1.79473	14.0431	0.93813	29.2695
O14791	Lipoproteins	Apolipoprotein L1 OS=Homo sapiens GN=APOL1 PE=1 SV=5	0.0463409	0.00855693	0.0527336	0.0364783	0.117246	0.0375786	0.131242	0.127707
P08519	Lipoproteins	Apolipoprotein(a) OS=Homo sapiens GN=LPA PE=1 SV=1	0.36741	0.156201	0.217203	0.178021	0.929573	0.685971	0.540569	0.623232
P02749	Lipoproteins	Beta-2-glycoprotein 1 OS=Homo sapiens GN=APOH PE=1 SV=3	2.02401	0.0304775	1.25128	0.124647	5.1209	0.133845	3.11416	0.436374
P10909	Lipoproteins	Clusterin OS=Homo sapiens GN=CLU PE=1 SV=1	1.5686	22.3846	0.948554	31.5101	3.96868	98.3039	2.36074	110.314
P04180	Lipoproteins	Phosphatidylcholine-sterol acyltransferase OS=Homo sapiens GN=LCAT PE=1 SV=1	0.0830941	0.00303966	0.0891325	0.0153878	0.210234	0.0133489	0.221831	0.0538711
P27169	Lipoproteins	Serum paraoxonase/arylesterase 1 OS=Homo sapiens GN=PON1 PE=1 SV=3	0.164426	0.0165353	0.25357	0.286296	0.41601	0.0726165	0.631079	1.00229
Q9P2J9	Other Plasma components	[Pyruvate dehydrogenase [acetyl-transferring]]-phosphatase 2, mitochondrial OS=Homo sapiens GN=PDP2 PE=2 SV=2	0.0367422	0.054324	0.0291904	0.0293975	0.0929604	0.238569	0.0726482	0.102917
P56937	Other Plasma components	3-keto-steroid reductase OS=Homo sapiens GN=HSD17B7 PE=1 SV=1	0.010581	0	0.00922791	0.00425533	0.0267707	0	0.0229662	0.0148975
P46779	Other Plasma components	60S ribosomal protein L28 OS=Homo sapiens GN=RPL28 PE=1 SV=3	0.148837	0.0601289	0.121351	0.0636784	0.376569	0.264062	0.302015	0.222931
P62736;P63267;P68032;P68133;Q9BYX7	Other Plasma components	Actin, aortic smooth muscle OS=Homo sapiens GN=ACTA2 PE=1 SV=1	0.0542842	0.0951655	0.0979463	0.303167	0.137343	0.417929	0.243766	1.06135
P63261;P60709	Other Plasma components	Actin, cytoplasmic 2 OS=Homo sapiens GN=ACTG1 PE=1 SV=1	0.137285	0.0752544	0.155329	0.159706	0.347341	0.330487	0.38658	0.559112
P43652	Other Plasma components	Afamin OS=Homo sapiens GN=AFM PE=1 SV=1	0.0526534	0.00829456	0.04963	0.0284173	0.133217	0.0364264	0.123518	0.0994861
P04217	Other Plasma components	Alpha-1B-glycoprotein OS=Homo sapiens GN=A1BG PE=1 SV=4	0.83959	0.166314	0.625482	0.516373	2.12422	0.730382	1.55669	1.80777
P02765	Other Plasma components	Alpha-2-HS-glycoprotein OS=Homo sapiens GN=AHSG PE=1 SV=1	0.282585	0.18497	0.968753	0.170223	0.71496	0.812312	2.41101	0.595932
P04745;P04746;P19961	Other Plasma components	Alpha-amylase 1 OS=Homo sapiens GN=AMY1A PE=1 SV=2	0.0344708	0.0013673	0.014075	0.0201382	0.0872135	0.00600465	0.0350294	0.0705017
P01019	Other Plasma components	Angiotensinogen OS=Homo sapiens GN=AGT PE=1 SV=1	0.280096	0.0219363	0.150046	0.0476652	0.708663	0.0963353	0.373431	0.166871
Q9P287	Other Plasma components	BRCA2 and CDKN1A-interacting protein OS=Homo sapiens GN=BCCIP PE=1 SV=1	0.0539583	0.0196236	0.0642246	0.036446	0.136518	0.0861787	0.159841	0.127594
Q9HA72	Other Plasma components	Calcium homeostasis modulator protein 2 OS=Homo sapiens GN=CALHM2 PE=2 SV=1	0.0213854	0.0637491	0.0261279	0.18032	0.0541067	0.27996	0.0650266	0.63128
P22792	Other Plasma components	Carboxypeptidase N subunit 2 OS=Homo sapiens GN=CPN2 PE=1 SV=3	0.000188831	0	0.00773001	0	0.000477756	0	0.0192383	0
Q96SN8	Other Plasma components	CDK5 regulatory subunit-associated protein 2 OS=Homo sapiens GN=CDK5RAP2 PE=1 SV=5	0.545279	0.349745	0.330987	0.284715	1.37959	1.53594	0.823753	0.996759
Q9C0B2	Other Plasma components	Cilia- and flagella-associated protein 74 OS=Homo sapiens GN=CFAP74 PE=2 SV=3	0.242228	2.28749	0.323087	0.305491	0.612854	10.0457	0.804091	1.06949
Q8NEF3	Other Plasma components	Coiled-coil domain-containing protein 112 OS=Homo sapiens GN=CCDC112 PE=1 SV=2	0.394529	0.0746907	0.25374	0.184187	0.998186	0.328011	0.631503	0.64482
Q9BRP7	Other Plasma components	Ferredoxin-fold anticodon-binding domain-containing protein 1 OS=Homo sapiens GN=FDXACB1 PE=1 SV=3	0.0488315	0.116327	0.0300845	0.0287237	0.123547	0.510861	0.0748736	0.100559
P21781	Other Plasma components	Fibroblast growth factor 7 OS=Homo sapiens GN=FGF7 PE=1 SV=1	0.0190782	0.0230131	0.0211017	0.101266	0.0482692	0.101064	0.0525174	0.354521
P21333	Other Plasma components	Filamin-A OS=Homo sapiens GN=FLNA PE=1 SV=4	0.0269285	0.00303596	0.0232765	0.0142154	0.068131	0.0133327	0.05793	0.0497667
O75496	Other Plasma components	Geminin OS=Homo sapiens GN=GMNN PE=1 SV=1	0.0104884	0	0.178892	0.000984323	0.0265363	0	0.445223	0.00344601
Q9NWU2	Other Plasma components	Glucose-induced degradation protein 8 homolog OS=Homo sapiens GN=GID8 PE=1 SV=1	0.0251041	0	0.0601784	0.0973587	0.0635151	0	0.14977	0.340842
A6NFK2	Other Plasma components	Glutaredoxin domain-containing cysteine-rich protein 2 OS=Homo sapiens GN=GRXCR2 PE=3 SV=1	0.0302475	0.142286	0.0379157	0.249129	0.0765285	0.624863	0.0943636	0.872172
P22352	Other Plasma components	Glutathione peroxidase 3 OS=Homo sapiens GN=GPX3 PE=1 SV=2	0.16903	0.218807	0.0879616	0.177649	0.427658	0.960913	0.218917	0.621931
Q9H4G4	Other Plasma components	Golgi-associated plant pathogenesis-related protein 1 OS=Homo sapiens GN=GLIPR2 PE=1 SV=3	0.069143	0.0450074	0.0509237	0.0434411	0.174937	0.197654	0.126738	0.152083
Q03014	Other Plasma components	Hematopoietically-expressed homeobox protein HHEX OS=Homo sapiens GN=HHEX PE=1 SV=1	0.510359	0.00895042	5.24468	0.158272	1.29124	0.0393066	13.0528	0.554093
P69905	Other Plasma components	Hemoglobin subunit alpha OS=Homo sapiens GN=HBA1 PE=1 SV=2	0.0386808	0.364786	0.0329206	0.0397886	0.0978653	1.60199	0.0819319	0.139296
P68871;P02100	Other Plasma components	Hemoglobin subunit beta OS=Homo sapiens GN=HBB PE=1 SV=2	0.197326	0.175341	0.0986007	0.0823628	0.499248	0.770027	0.245395	0.288343
P02042	Other Plasma components	Hemoglobin subunit delta OS=Homo sapiens GN=HBD PE=1 SV=2	0.0440143	0.0470526	0.0180383	0.0128152	0.111359	0.206636	0.0448932	0.0448645
P02790	Other Plasma components	Hemopexin OS=Homo sapiens GN=HPX PE=1 SV=2	1.72555	0.111002	16.7778	0.536424	4.36578	0.487477	41.7561	1.87796
P51991	Other Plasma components	Heterogeneous nuclear ribonucleoprotein A3 OS=Homo sapiens GN=HNRNPA3 PE=1 SV=2	0.173977	0.503324	0.117527	0.182777	0.440175	2.21039	0.292499	0.639881
Q8IX15	Other Plasma components	Homeobox and leucine zipper protein Homez OS=Homo sapiens GN=HOMEZ PE=1 SV=2	0.466368	0.723693	0.27031	0.165881	1.17995	3.17817	0.67274	0.58073
P28358	Other Plasma components	Homeobox protein Hox-D10 OS=Homo sapiens GN=HOXD10 PE=1 SV=2	1.01728	1.48936	0.633762	0.465859	2.5738	6.54069	1.57729	1.63092
P35858	Other Plasma components	Insulin-like growth factor-binding protein complex acid labile subunit OS=Homo sapiens GN=IGFALS PE=1 SV=1	0.0318575	0.00524034	0.0396346	0.020539	0.0806018	0.0230135	0.0986417	0.0719048
Q8WWA0;Q8WWU7	Other Plasma components	Intelectin-1 OS=Homo sapiens GN=ITLN1 PE=1 SV=1	0.0301351	0.00017256	0.0149712	0.00612705	0.0762438	0.000757813	0.0372599	0.0214502
P19827	Other Plasma components	Inter-alpha-trypsin inhibitor heavy chain H1 OS=Homo sapiens GN=ITIH1 PE=1 SV=3	0.303311	0.0199638	0.333021	0.102533	0.767399	0.0876728	0.828815	0.358957
P19823	Other Plasma components	Inter-alpha-trypsin inhibitor heavy chain H2 OS=Homo sapiens GN=ITIH2 PE=1 SV=2	0.418039	0.134367	0.384976	0.108107	1.05767	0.590084	0.958118	0.378469
Q14624	Other Plasma components	Inter-alpha-trypsin inhibitor heavy chain H4 OS=Homo sapiens GN=ITIH4 PE=1 SV=4	0.376775	0.172946	0.360488	0.0819481	0.953269	0.759511	0.897174	0.286892
P05015	Other Plasma components	Interferon alpha-16 OS=Homo sapiens GN=IFNA16 PE=2 SV=1	0.185052	0.112066	0.141776	0.114277	0.468195	0.492149	0.352849	0.400072
O43278	Other Plasma components	Kunitz-type protease inhibitor 1 OS=Homo sapiens GN=SPINT1 PE=1 SV=2	0.184907	0.118988	0.118324	0.104793	0.467828	0.522546	0.294481	0.366871
P02750	Other Plasma components	Leucine-rich alpha-2-glycoprotein OS=Homo sapiens GN=LRG1 PE=1 SV=2	3.57992	0.00985859	2.06364	0.0552718	9.05745	0.043295	5.13595	0.193501
O15303	Other Plasma components	Metabotropic glutamate receptor 6 OS=Homo sapiens GN=GRM6 PE=1 SV=2	0	0	0.0822019	0.0303422	0	0	0.204582	0.106225
P55083	Other Plasma components	Microfibril-associated glycoprotein 4 OS=Homo sapiens GN=MFAP4 PE=1 SV=2	0.0132686	0	0.0207685	0.00601747	0.0335705	0	0.0516881	0.0210665
P45984	Other Plasma components	Mitogen-activated protein kinase 9 OS=Homo sapiens GN=MAPK9 PE=1 SV=2	0.216673	0.0118873	0.310347	0.170256	0.548197	0.0522044	0.772384	0.596049
Q15796	Other Plasma components	Mothers against decapentaplegic homolog 2 OS=Homo sapiens GN=SMAD2 PE=1 SV=1	0.000889098	0.00554084	0.0014138	0.010856	0.00224948	0.0243331	0.00351864	0.0380058
Q96NY8	Other Plasma components	Nectin-4 OS=Homo sapiens GN=NECTIN4 PE=1 SV=1	0.0446953	0.0174788	0.0264395	0.0159645	0.113082	0.0767597	0.0658019	0.0558901
Q9BR09	Other Plasma components	Neuralized-like protein 2 OS=Homo sapiens GN=NEURL2 PE=2 SV=1	6.96156e-05	0.00644479	0.00171878	0.0039165	0.000176132	0.0283029	0.00427767	0.0137112
Q14980	Other Plasma components	Nuclear mitotic apparatus protein 1 OS=Homo sapiens GN=NUMA1 PE=1 SV=2	0.150602	0.155626	0.158839	0.100371	0.381034	0.683445	0.395314	0.351388
P36955	Other Plasma components	Pigment epithelium-derived factor OS=Homo sapiens GN=SERPINF1 PE=1 SV=4	0.322993	0.0598003	0.166654	0.12482	0.817194	0.262619	0.414764	0.436982
P00747;Q02325;Q15195	Other Plasma components	Plasminogen OS=Homo sapiens GN=PLG PE=1 SV=2	1.12359	0.0197535	0.697064	0.102518	2.84277	0.0867495	1.73484	0.358904
Q96N28	Other Plasma components	PRELI domain containing protein 3A OS=Homo sapiens GN=PRELID3A PE=1 SV=1	0.149163	0.273569	0.102159	0.0869961	0.377394	1.2014	0.254252	0.304564
Q7L014	Other Plasma components	Probable ATP-dependent RNA helicase DDX46 OS=Homo sapiens GN=DDX46 PE=1 SV=2	0.107992	0.121597	0.099928	0.465175	0.273228	0.534004	0.248698	1.62853
P41222	Other Plasma components	Prostaglandin-H2 D-isomerase OS=Homo sapiens GN=PTGDS PE=1 SV=1	0.0785256	0.00910935	0.0441854	0.0230774	0.198675	0.0400046	0.109968	0.0807915
P02760	Other Plasma components	Protein AMBP OS=Homo sapiens GN=AMBP PE=1 SV=1	0.26946	0.0171901	0.313691	0.0422187	0.681754	0.0754918	0.780706	0.147803
Q8TAY7	Other Plasma components	Protein FAM110D OS=Homo sapiens GN=FAM110D PE=2 SV=1	0.0105458	0.0590102	0.0236005	0.18946	0.0266815	0.259149	0.0587364	0.663281
Q5W0V3	Other Plasma components	Protein FAM160B1 OS=Homo sapiens GN=FAM160B1 PE=1 SV=1	0.0902413	0.00152299	0.0481066	0.0251285	0.228317	0.00668834	0.119727	0.0879721
Q5R3K3	Other Plasma components	Protein FAM26F OS=Homo sapiens GN=FAM26F PE=2 SV=1	0.0639929	0	0.0775509	0.0256865	0.161907	0	0.193007	0.0899259
Q93098	Other Plasma components	Protein Wnt-8b OS=Homo sapiens GN=WNT8B PE=2 SV=3	0.00943345	0.0100401	0.00806562	0.0153939	0.0238673	0.0440921	0.0200735	0.0538925
O95397	Other Plasma components	Putative protein PLEKHA9 OS=Homo sapiens GN=PLEKHA8P1 PE=5 SV=1	0.139795	0.136219	0.121452	0.379789	0.353692	0.59822	0.302266	1.3296
Q8N8H1	Other Plasma components	Putative protein ZNF321 OS=Homo sapiens GN=ZNF321P PE=5 SV=3	0.205166	0	0.118493	0.0681083	0.519084	0	0.294903	0.23844
A8MX80	Other Plasma components	Putative UPF0607 protein ENSP00000383144 OS=Homo sapiens PE=3 SV=2	0.0484724	0.0178652	0.108557	0.150405	0.122639	0.0784569	0.270174	0.526553
O95755	Other Plasma components	Ras-related protein Rab-36 OS=Homo sapiens GN=RAB36 PE=2 SV=2	0.00413122	0.0119954	0.00615975	0.0446042	0.0104523	0.0526791	0.0153302	0.156155
A6NIZ1;P61224;P62834	Other Plasma components	Ras-related protein Rap-1b-like protein OS=Homo sapiens PE=2 SV=1	0.0222268	0.00192235	0.0165546	0.00278544	0.0562353	0.0084422	0.0412006	0.00975154
P49798	Other Plasma components	Regulator of G-protein signaling 4 OS=Homo sapiens GN=RGS4 PE=1 SV=1	0.00140187	0.00132369	0.0309171	0.0188675	0.00354684	0.00581309	0.0769456	0.066053
Q92681	Other Plasma components	Regulatory solute carrier protein family 1 member 1 OS=Homo sapiens GN=RSC1A1 PE=2 SV=1	0.0698814	0.0187277	0.0717958	0.0578398	0.176805	0.0822443	0.178684	0.202491
Q8TDE3	Other Plasma components	Ribonuclease 8 OS=Homo sapiens GN=RNASE8 PE=1 SV=1	0.000475422	0.00864546	3.51453e-06	0.0250024	0.00120285	0.0379674	8.74688e-06	0.0875307
Q15413	Other Plasma components	Ryanodine receptor 3 OS=Homo sapiens GN=RYR3 PE=1 SV=3	0.176863	0.222362	0.0986621	0.100166	0.447475	0.976523	0.245548	0.35067
P02787	Other Plasma components	Serotransferrin OS=Homo sapiens GN=TF PE=1 SV=3	2.53291	0.594095	1.26625	0.683085	6.40844	2.60902	3.15141	2.39141
P02768	Other Plasma components	Serum albumin OS=Homo sapiens GN=ALB PE=1 SV=2	11.6615	5.30266	6.71916	5.22344	29.5044	23.2872	16.7225	18.2867
P0DJI9	Other Plasma components	Serum amyloid A-2 protein OS=Homo sapiens GN=SAA2 PE=1 SV=1	0.021932	0.0544316	0.0121881	0.0138885	0.0554896	0.239042	0.0303333	0.0486223
P04278	Other Plasma components	Sex hormone-binding globulin OS=Homo sapiens GN=SHBG PE=1 SV=2	0.0544545	0.005894	0.0380806	0.00979665	0.137774	0.0258841	0.0947741	0.034297
P98077	Other Plasma components	SHC-transforming protein 2 OS=Homo sapiens GN=SHC2 PE=1 SV=4	0.00413099	0.000213251	0.00576629	0.0616246	0.0104517	0.000936511	0.014351	0.215741
Q9H7L9	Other Plasma components	Sin3 histone deacetylase corepressor complex component SDS3 OS=Homo sapiens GN=SUDS3 PE=1 SV=2	0.00638238	0	0.0192814	0.00340369	0.0161479	0	0.047987	0.011916
Q9UMR3	Other Plasma components	T-box transcription factor TBX20 OS=Homo sapiens GN=TBX20 PE=1 SV=4	0.185717	1.77132	0.271011	0.925658	0.469878	7.7789	0.674486	3.24063
Q99614	Other Plasma components	Tetratricopeptide repeat protein 1 OS=Homo sapiens GN=TTC1 PE=1 SV=1	0.0012968	0	0.156082	0.00863148	0.003281	0	0.388453	0.0302179
Q9NZI6	Other Plasma components	Transcription factor CP2-like protein 1 OS=Homo sapiens GN=TFCP2L1 PE=2 SV=1	0.276467	0.564928	0.190692	0.173966	0.699482	2.48093	0.47459	0.609037
Q6ZMR5	Other Plasma components	Transmembrane protease serine 11A OS=Homo sapiens GN=TMPRSS11A PE=1 SV=1	0.285174	0.11141	0.119318	0.201972	0.721511	0.489268	0.296955	0.707084
P02766	Other Plasma components	Transthyretin OS=Homo sapiens GN=TTR PE=1 SV=1	0.0475474	0.012928	0.0507282	0.0532786	0.120298	0.0567744	0.126251	0.186523
Q96DX7	Other Plasma components	Tripartite motif-containing protein 44 OS=Homo sapiens GN=TRIM44 PE=1 SV=1	0.0204017	0.000367508	0.0124556	0.0098166	0.0516179	0.00161395	0.0309993	0.0343669
P07477	Other Plasma components	Trypsin-1 OS=Homo sapiens GN=PRSS1 PE=1 SV=1	2.01089	4.08736	1.23294	1.02796	5.0877	17.95	3.06852	3.5988
Q96NA8	Other Plasma components	t-SNARE domain-containing protein 1 OS=Homo sapiens GN=TSNARE1 PE=1 SV=2	0.0385879	0.00256485	0.723304	0.00605761	0.0976301	0.0112638	1.80014	0.0212071
A6NCN8	Other Plasma components	Uncharacterized protein ENSP00000372125 OS=Homo sapiens PE=4 SV=2	0.0645276	0.0347325	0.0509104	0.00698349	0.163259	0.152531	0.126704	0.0244484
Q6EMK4	Other Plasma components	Vasorin OS=Homo sapiens GN=VASN PE=1 SV=1	0.0673764	0.00111381	0.052591	0.00670038	0.170467	0.00489138	0.130887	0.0234573
P02774	Other Plasma components	Vitamin D-binding protein OS=Homo sapiens GN=GC PE=1 SV=1	0.166523	0.0124033	0.0825467	0.0630478	0.421314	0.0544702	0.20544	0.220724
P54284	Other Plasma components	Voltage-dependent L-type calcium channel subunit beta-3 OS=Homo sapiens GN=CACNB3 PE=1 SV=1	0.264596	0.00789875	0.235807	0.0302368	0.669447	0.0346881	0.58687	0.105856
P25311	Other Plasma components	Zinc-alpha-2-glycoprotein OS=Homo sapiens GN=AZGP1 PE=1 SV=2	0.118804	0.120437	0.418477	0.230686	0.300582	0.528909	1.04149	0.807608
Q562R1	Tissue Leakage	Beta-actin-like protein 2 OS=Homo sapiens GN=ACTBL2 PE=1 SV=2	0.0239765	0.0161494	0.0231808	0.0177305	0.0606621	0.0709217	0.0576918	0.0620727
P49747	Tissue Leakage	Cartilage oligomeric matrix protein OS=Homo sapiens GN=COMP PE=1 SV=2	0.388127	0.0161229	0.202678	0.0483858	0.98199	0.0708055	0.504419	0.169393
O43866	Tissue Leakage	CD5 antigen-like OS=Homo sapiens GN=CD5L PE=1 SV=1	0.236696	0.273521	0.190574	0.158708	0.598859	1.2012	0.474297	0.555621
Q14204	Tissue Leakage	Cytoplasmic dynein 1 heavy chain 1 OS=Homo sapiens GN=DYNC1H1 PE=1 SV=5	0.155366	0.0418853	0.417047	0.0658327	0.393087	0.183943	1.03794	0.230473
P06396	Tissue Leakage	Gelsolin OS=Homo sapiens GN=GSN PE=1 SV=1	0.210989	0.0327209	0.129126	0.0846562	0.533817	0.143697	0.321365	0.296372
P04406	Tissue Leakage	Glyceraldehyde-3-phosphate dehydrogenase OS=Homo sapiens GN=GAPDH PE=1 SV=3	0.00743741	0.0307788	0.00412724	0.0374941	0.0188172	0.135168	0.0102718	0.131263
P26927	Tissue Leakage	Hepatocyte growth factor-like protein OS=Homo sapiens GN=MST1 PE=1 SV=2	0.479597	0.0951909	0.172134	0.104693	1.21341	0.41804	0.428403	0.366521
Q15323	Tissue Leakage	Keratin, type I cuticular Ha1 OS=Homo sapiens GN=KRT31 PE=1 SV=3	0.0215459	0.0109795	0.0155618	0.028559	0.0545127	0.0482176	0.0387298	0.0999822
Q14525	Tissue Leakage	Keratin, type I cuticular Ha3-II OS=Homo sapiens GN=KRT33B PE=1 SV=3	0.0139674	0.069708	0.0144575	0.0416163	0.0353385	0.306129	0.0359815	0.145694
Q92764	Tissue Leakage	Keratin, type I cuticular Ha5 OS=Homo sapiens GN=KRT35 PE=2 SV=5	0.0368565	0.0559885	0.0303414	0.155875	0.0932495	0.245879	0.075513	0.545703
O76013	Tissue Leakage	Keratin, type I cuticular Ha6 OS=Homo sapiens GN=KRT36 PE=2 SV=1	0.0467564	0.125061	0.0353294	0.0392516	0.118297	0.549216	0.087927	0.137416
O76015;O76014	Tissue Leakage	Keratin, type I cuticular Ha8 OS=Homo sapiens GN=KRT38 PE=1 SV=3	0.0129073	0.00282345	0.00797918	0.00717563	0.0326564	0.0123995	0.0198584	0.0251211
P13645;Q14532;Q7Z3Y7;Q7Z3Y8;Q7Z3Y9;Q99456	Tissue Leakage	Keratin, type I cytoskeletal 10 OS=Homo sapiens GN=KRT10 PE=1 SV=6	0.895533	0.478161	0.353653	0.409131	2.26576	2.09989	0.880164	1.43232
P13646	Tissue Leakage	Keratin, type I cytoskeletal 13 OS=Homo sapiens GN=KRT13 PE=1 SV=4	0.071512	0.0383928	0.07013	0.0435354	0.18093	0.168606	0.174538	0.152413
P02533	Tissue Leakage	Keratin, type I cytoskeletal 14 OS=Homo sapiens GN=KRT14 PE=1 SV=4	0.225799	0.0901629	0.15083	0.121568	0.571287	0.395959	0.375381	0.425596
P19012	Tissue Leakage	Keratin, type I cytoskeletal 15 OS=Homo sapiens GN=KRT15 PE=1 SV=3	1.09717	1.62795	0.806687	1.07333	2.77591	7.1493	2.00766	3.75762
P08779	Tissue Leakage	Keratin, type I cytoskeletal 16 OS=Homo sapiens GN=KRT16 PE=1 SV=4	0.115307	0.0322094	0.056976	0.0428001	0.291735	0.141451	0.141801	0.149839
Q04695	Tissue Leakage	Keratin, type I cytoskeletal 17 OS=Homo sapiens GN=KRT17 PE=1 SV=2	0.14477	0.0226138	0.38865	0.0881986	0.366278	0.0993107	0.967261	0.308774
P05783	Tissue Leakage	Keratin, type I cytoskeletal 18 OS=Homo sapiens GN=KRT18 PE=1 SV=2	0.568519	0.298984	0.331184	0.198904	1.43839	1.31302	0.824243	0.69634
P08727	Tissue Leakage	Keratin, type I cytoskeletal 19 OS=Homo sapiens GN=KRT19 PE=1 SV=4	0.0122057	0.0335349	0.0207397	0.0250937	0.0308812	0.147272	0.0516164	0.0878504
Q2M2I5	Tissue Leakage	Keratin, type I cytoskeletal 24 OS=Homo sapiens GN=KRT24 PE=1 SV=1	0.238112	0.583699	0.165748	0.3937	0.602441	2.56337	0.412509	1.3783
Q7Z3Z0	Tissue Leakage	Keratin, type I cytoskeletal 25 OS=Homo sapiens GN=KRT25 PE=1 SV=1	0.848061	0.142764	0.638179	0.20087	2.14566	0.62696	1.58828	0.703224
P35527	Tissue Leakage	Keratin, type I cytoskeletal 9 OS=Homo sapiens GN=KRT9 PE=1 SV=3	1.08197	0.606312	0.622753	0.471979	2.73746	2.66268	1.54989	1.65235
P04264	Tissue Leakage	Keratin, type II cytoskeletal 1 OS=Homo sapiens GN=KRT1 PE=1 SV=6	1.47357	0.835724	0.764268	0.682874	3.72823	3.67016	1.90209	2.39067
Q7Z794	Tissue Leakage	Keratin, type II cytoskeletal 1b OS=Homo sapiens GN=KRT77 PE=2 SV=3	0.194763	0.186293	0.109081	0.105732	0.492764	0.818123	0.271478	0.370158
P35908;P12035;Q86Y46	Tissue Leakage	Keratin, type II cytoskeletal 2 epidermal OS=Homo sapiens GN=KRT2 PE=1 SV=2	0.556121	0.85057	0.361644	0.384349	1.40702	3.73536	0.90005	1.34557
Q01546	Tissue Leakage	Keratin, type II cytoskeletal 2 oral OS=Homo sapiens GN=KRT76 PE=1 SV=2	0.012758	0.00166493	0.00674325	0.00505731	0.0322785	0.0073117	0.0167824	0.0177051
P13647	Tissue Leakage	Keratin, type II cytoskeletal 5 OS=Homo sapiens GN=KRT5 PE=1 SV=3	0.140236	0.185056	0.062544	0.126567	0.354807	0.81269	0.155658	0.443097
P02538	Tissue Leakage	Keratin, type II cytoskeletal 6A OS=Homo sapiens GN=KRT6A PE=1 SV=3	0.100492	0.149625	0.0548925	0.0459644	0.254252	0.657092	0.136615	0.160917
P04259;O95678;P48668	Tissue Leakage	Keratin, type II cytoskeletal 6B OS=Homo sapiens GN=KRT6B PE=1 SV=5	0.160961	0.049153	0.110121	0.0785122	0.407242	0.21586	0.274067	0.274863
Q7RTS7	Tissue Leakage	Keratin, type II cytoskeletal 74 OS=Homo sapiens GN=KRT74 PE=1 SV=2	0.110722	0.351531	0.105999	0.159262	0.280135	1.54378	0.263808	0.55756
Q5XKE5	Tissue Leakage	Keratin, type II cytoskeletal 79 OS=Homo sapiens GN=KRT79 PE=1 SV=2	0.0273581	0.0137237	0.0201977	0.0336182	0.0692179	0.0602688	0.0502676	0.117694
P51884	Tissue Leakage	Lumican OS=Homo sapiens GN=LUM PE=1 SV=2	0.433452	0.138425	0.335264	0.155645	1.09666	0.607907	0.834397	0.544898
Q96PD5	Tissue Leakage	N-acetylmuramoyl-L-alanine amidase OS=Homo sapiens GN=PGLYRP2 PE=1 SV=1	0.0605143	0.00690015	0.0511951	0.0304693	0.153105	0.0303027	0.127413	0.10667
Q6S8J3	Tissue Leakage	POTE ankyrin domain family member E OS=Homo sapiens GN=POTEE PE=2 SV=3	0.163675	0.0983238	0.0971071	0.0629959	0.414108	0.431798	0.241678	0.220542
A5A3E0	Tissue Leakage	POTE ankyrin domain family member F OS=Homo sapiens GN=POTEF PE=1 SV=2	0.0121795	0.0313776	0.00724522	0.0413242	0.030815	0.137798	0.0180317	0.144672
P07737	Tissue Leakage	Profilin-1 OS=Homo sapiens GN=PFN1 PE=1 SV=2	0.0214256	0.0293024	0.00371307	0.00213934	0.0542084	0.128684	0.009241	0.00748961
P05452	Tissue Leakage	Tetranectin OS=Homo sapiens GN=CLEC3B PE=1 SV=3	0.0149264	0.00332086	0.0406893	0.00191746	0.037765	0.0145839	0.101266	0.00671281
Q96EI5	Tissue Leakage	Transcription elongation factor A protein-like 4 OS=Homo sapiens GN=TCEAL4 PE=1 SV=2	0.005608	0.000212493	0.0745668	0.0337365	0.0141886	0.000933183	0.18558	0.118108
P04004	Tissue Leakage	Vitronectin OS=Homo sapiens GN=VTN PE=1 SV=1	0.988357	1.07103	0.877321	0.582429	2.50061	4.70352	2.18345	2.03902
Q86Y25	Tissue Leakage	Zinc finger protein 354C OS=Homo sapiens GN=ZNF354C PE=2 SV=1	0.0615732	0.0290363	0.0398279	0.0340198	0.155784	0.127516	0.0991227	0.1191
Q6ZN30	Tissue Leakage	Zinc finger protein basonuclin-2 OS=Homo sapiens GN=BNC2 PE=1 SV=1	0.307571	2.90831	0.16605	3.56145	0.778177	12.7721	0.413261	12.4682
